# Supplementary material
Source: publisher figshare collection journal article supplement (https://gsajournals.figshare.com/ndownloader/files/12533225)
Supplement: Supplementary file 1 [file 12533225]

## Sheet: ReadMe
Table Key
Plate ID	Unique identifier for individual plates carrying clones targeting RNAi across the 6 chromosomes. The PlateID represents chromosome_96wellPlateID_replicate, that is, 1_01_A1_1 denotes the 1st replicate run of plate 01_A1 from linkage group 1.
Imaging Date	Date the plates were imaged at the end of the experiment
Control	Indicates whether the controls denoted in the columns C-I were positive or negative controls for the purpose of this screen. For example, L4440 was used as negative whereas cye-1 was used as a positive control for sterility. Other "pos" controls included lag-1 for sterility, components of the MAPK pathway, RNAi for GFP (animals are fertile but do not contain GFP-labeled embryos, indicating that R…
Row	Rows on the individual plates
Column	Columns on the individual plates
Well	Row and column combined for the individual plates
Sterile	Number of worms that were sterile, that is lacking GFP+ embryos
Total	Total number of worms, that is, the number of mCherry+ pharynges
Sterility Ratio	Number of Sterile worms divided by the total number of worms per well
Z Score Plt	Z-score determined using ActivityBase(IDBS) for the individual wells assuming that the majority of wells on an individual plate is fertile (see Materials & Methods). "NaN" indicates 'Not a Number' where the total number of adult worms is 0.

## Sheet: PrimaryScreenRawData
Table S2. Primary screen results.
Raw data and results of statistical analysis from the primary screen.
PlateID	Imaging Date	L4440	GFP	lag-1	dpy	cye-1	mpk-1	mek-2	control	Row	Col	Well	sterile	total	Sterility Ratio	Z Score Plt
1_01_A1_1	2015-07-31									A	001	A001	0	7	0	-0.557699
1_01_A1_1	2015-07-31									A	002	A002	0	0	NaN	NaN
1_01_A1_1	2015-07-31									A	003	A003	1	13	0.076923	-0.233679
1_01_A1_1	2015-07-31									A	004	A004	0	10	0	-0.557699
1_01_A1_1	2015-07-31									A	005	A005	1	18	0.055556	-0.323685
1_01_A1_1	2015-07-31									A	006	A006	0	16	0	-0.557699
1_01_A1_1	2015-07-31									A	007	A007	0	12	0	-0.557699
1_01_A1_1	2015-07-31									A	008	A008	2	24	0.083333	-0.206678
1_01_A1_1	2015-07-31									A	009	A009	1	9	0.111111	-0.08967
1_01_A1_1	2015-07-31									A	010	A010	0	11	0	-0.557699
1_01_A1_1	2015-07-31									A	011	A011	3	18	0.166667	0.144344
1_01_A1_1	2015-07-31									A	012	A012	0	8	0	-0.557699
1_01_A1_1	2015-07-31									B	001	B001	1	8	0.125	-0.031167
1_01_A1_1	2015-07-31									B	002	B002	0	7	0	-0.557699
1_01_A1_1	2015-07-31									B	003	B003	0	10	0	-0.557699
1_01_A1_1	2015-07-31									B	004	B004	0	16	0	-0.557699
1_01_A1_1	2015-07-31									B	005	B005	2	21	0.095238	-0.156532
1_01_A1_1	2015-07-31									B	006	B006	1	12	0.083333	-0.206678
1_01_A1_1	2015-07-31									B	007	B007	5	5	1	3.65456
1_01_A1_1	2015-07-31									B	008	B008	0	13	0	-0.557699
1_01_A1_1	2015-07-31									B	009	B009	0	0	NaN	NaN
1_01_A1_1	2015-07-31									B	010	B010	0	15	0	-0.557699
1_01_A1_1	2015-07-31									B	011	B011	2	13	0.153846	0.090341
1_01_A1_1	2015-07-31									B	012	B012	0	11	0	-0.557699
1_01_A1_1	2015-07-31									C	001	C001	1	16	0.0625	-0.294433
1_01_A1_1	2015-07-31									C	002	C002	0	0	NaN	NaN
1_01_A1_1	2015-07-31									C	003	C003	0	13	0	-0.557699
1_01_A1_1	2015-07-31									C	004	C004	0	17	0	-0.557699
1_01_A1_1	2015-07-31									C	005	C005	4	23	0.173913	0.174868
1_01_A1_1	2015-07-31									C	006	C006	1	18	0.055556	-0.323685
1_01_A1_1	2015-07-31									C	007	C007	0	11	0	-0.557699
1_01_A1_1	2015-07-31									C	008	C008	0	0	NaN	NaN
1_01_A1_1	2015-07-31									C	009	C009	4	16	0.25	0.495366
1_01_A1_1	2015-07-31									C	010	C010	1	8	0.125	-0.031167
1_01_A1_1	2015-07-31									C	011	C011	1	11	0.090909	-0.174766
1_01_A1_1	2015-07-31									C	012	C012	1	10	0.1	-0.136473
1_01_A1_1	2015-07-31									D	001	D001	0	10	0	-0.557699
1_01_A1_1	2015-07-31									D	002	D002	1	11	0.090909	-0.174766
1_01_A1_1	2015-07-31									D	003	D003	0	13	0	-0.557699
1_01_A1_1	2015-07-31									D	004	D004	0	16	0	-0.557699
1_01_A1_1	2015-07-31									D	005	D005	0	0	NaN	NaN
1_01_A1_1	2015-07-31									D	006	D006	1	11	0.090909	-0.174766
1_01_A1_1	2015-07-31									D	007	D007	1	7	0.142857	0.044052
1_01_A1_1	2015-07-31									D	008	D008	1	8	0.125	-0.031167
1_01_A1_1	2015-07-31									D	009	D009	0	0	NaN	NaN
1_01_A1_1	2015-07-31									D	010	D010	0	15	0	-0.557699
1_01_A1_1	2015-07-31									D	011	D011	2	18	0.111111	-0.08967
1_01_A1_1	2015-07-31									D	012	D012	2	16	0.125	-0.031167
1_01_A1_1	2015-07-31									E	001	E001	2	15	0.133333	0.003936
1_01_A1_1	2015-07-31									E	002	E002	0	0	NaN	NaN
1_01_A1_1	2015-07-31									E	003	E003	1	15	0.066667	-0.276882
1_01_A1_1	2015-07-31									E	004	E004	0	23	0	-0.557699
1_01_A1_1	2015-07-31									E	005	E005	1	12	0.083333	-0.206678
1_01_A1_1	2015-07-31									E	006	E006	3	11	0.272727	0.591099
1_01_A1_1	2015-07-31									E	007	E007	0	0	NaN	NaN
1_01_A1_1	2015-07-31									E	008	E008	0	0	NaN	NaN
1_01_A1_1	2015-07-31									E	009	E009	0	0	NaN	NaN
1_01_A1_1	2015-07-31									E	010	E010	1	15	0.066667	-0.276882
1_01_A1_1	2015-07-31									E	011	E011	2	19	0.105263	-0.114303
1_01_A1_1	2015-07-31									E	012	E012	3	24	0.125	-0.031167
1_01_A1_1	2015-07-31									F	001	F001	0	0	NaN	NaN
1_01_A1_1	2015-07-31									F	002	F002	0	9	0	-0.557699
1_01_A1_1	2015-07-31									F	003	F003	0	11	0	-0.557699
1_01_A1_1	2015-07-31									F	004	F004	0	10	0	-0.557699
1_01_A1_1	2015-07-31									F	005	F005	1	14	0.071429	-0.256823
1_01_A1_1	2015-07-31									F	006	F006	0	7	0	-0.557699
1_01_A1_1	2015-07-31									F	007	F007	1	5	0.2	0.284753
1_01_A1_1	2015-07-31		GFP						pos	F	008	F008	6	6	1	3.65456
1_01_A1_1	2015-07-31				dpy				neg	F	009	F009	2	11	0.181818	0.208166
1_01_A1_1	2015-07-31	L4440							neg	F	010	F010	2	20	0.1	-0.136473
1_01_A1_1	2015-07-31									F	011	F011	0	15	0	-0.557699
1_01_A1_1	2015-07-31							mek-2	pos	F	012	F012	12	12	1	3.65456
1_01_A1_1	2015-07-31									G	001	G001	0	0	NaN	NaN
1_01_A1_1	2015-07-31									G	002	G002	0	9	0	-0.557699
1_01_A1_1	2015-07-31									G	003	G003	0	8	0	-0.557699
1_01_A1_1	2015-07-31									G	004	G004	2	8	0.25	0.495366
1_01_A1_1	2015-07-31									G	005	G005	1	8	0.125	-0.031167
1_01_A1_1	2015-07-31			lag-1					pos	G	006	G006	0	8	0	-0.557699
1_01_A1_1	2015-07-31									G	007	G007	0	0	NaN	NaN
1_01_A1_1	2015-07-31									G	008	G008	0	4	0	-0.557699
1_01_A1_1	2015-07-31						mpk-1		pos	G	009	G009	9	9	1	3.65456
1_01_A1_1	2015-07-31									G	010	G010	2	10	0.2	0.284753
1_01_A1_1	2015-07-31									G	011	G011	1	8	0.125	-0.031167
1_01_A1_1	2015-07-31									G	012	G012	0	6	0	-0.557699
1_01_A1_1	2015-07-31									H	001	H001	0	5	0	-0.557699
1_01_A1_1	2015-07-31									H	002	H002	0	0	NaN	NaN
1_01_A1_1	2015-07-31									H	003	H003	2	9	0.222222	0.378359
1_01_A1_1	2015-07-31									H	004	H004	0	0	NaN	NaN
1_01_A1_1	2015-07-31									H	005	H005	2	14	0.142857	0.044052
1_01_A1_1	2015-07-31									H	006	H006	1	10	0.1	-0.136473
1_01_A1_1	2015-07-31					cye-1			pos	H	007	H007	1	3	0.333333	0.846388
1_01_A1_1	2015-07-31									H	008	H008	5	5	1	3.65456
1_01_A1_1	2015-07-31									H	009	H009	0	6	0	-0.557699
1_01_A1_1	2015-07-31									H	010	H010	2	10	0.2	0.284753
1_01_A1_1	2015-07-31									H	011	H011	0	8	0	-0.557699
1_01_A1_1	2015-07-31									H	012	H012	1	8	0.125	-0.031167
1_01_A1_2	2015-07-31									A	001	A001	1	7	0.142857	0.086957
1_01_A1_2	2015-07-31									A	002	A002	0	0	NaN	NaN
1_01_A1_2	2015-07-31									A	003	A003	0	11	0	-0.522259
1_01_A1_2	2015-07-31									A	004	A004	0	13	0	-0.522259
1_01_A1_2	2015-07-31									A	005	A005	1	15	0.066667	-0.237958
1_01_A1_2	2015-07-31									A	006	A006	0	12	0	-0.522259
1_01_A1_2	2015-07-31									A	007	A007	1	12	0.083333	-0.166883
1_01_A1_2	2015-07-31									A	008	A008	0	13	0	-0.522259
1_01_A1_2	2015-07-31									A	009	A009	1	15	0.066667	-0.237958
1_01_A1_2	2015-07-31									A	010	A010	0	17	0	-0.522259
1_01_A1_2	2015-07-31									A	011	A011	0	12	0	-0.522259
1_01_A1_2	2015-07-31									A	012	A012	0	15	0	-0.522259
1_01_A1_2	2015-07-31									B	001	B001	1	10	0.1	-0.095808
1_01_A1_2	2015-07-31									B	002	B002	0	16	0	-0.522259
1_01_A1_2	2015-07-31									B	003	B003	0	8	0	-0.522259
1_01_A1_2	2015-07-31									B	004	B004	1	11	0.090909	-0.134576
1_01_A1_2	2015-07-31									B	005	B005	0	17	0	-0.522259
1_01_A1_2	2015-07-31									B	006	B006	0	8	0	-0.522259
1_01_A1_2	2015-07-31									B	007	B007	9	9	1	3.74226
1_01_A1_2	2015-07-31									B	008	B008	0	10	0	-0.522259
1_01_A1_2	2015-07-31									B	009	B009	0	0	NaN	NaN
1_01_A1_2	2015-07-31									B	010	B010	2	15	0.133333	0.046343
1_01_A1_2	2015-07-31									B	011	B011	0	11	0	-0.522259
1_01_A1_2	2015-07-31									B	012	B012	0	12	0	-0.522259
1_01_A1_2	2015-07-31									C	001	C001	1	15	0.066667	-0.237958
1_01_A1_2	2015-07-31									C	002	C002	0	0	NaN	NaN
1_01_A1_2	2015-07-31									C	003	C003	1	16	0.0625	-0.255727
1_01_A1_2	2015-07-31									C	004	C004	0	16	0	-0.522259
1_01_A1_2	2015-07-31									C	005	C005	0	22	0	-0.522259
1_01_A1_2	2015-07-31									C	006	C006	2	19	0.105263	-0.073363
1_01_A1_2	2015-07-31									C	007	C007	0	10	0	-0.522259
1_01_A1_2	2015-07-31									C	008	C008	0	0	NaN	NaN
1_01_A1_2	2015-07-31									C	009	C009	1	6	0.166667	0.188493
1_01_A1_2	2015-07-31									C	010	C010	0	13	0	-0.522259
1_01_A1_2	2015-07-31									C	011	C011	0	9	0	-0.522259
1_01_A1_2	2015-07-31									C	012	C012	0	16	0	-0.522259
1_01_A1_2	2015-07-31									D	001	D001	1	15	0.066667	-0.237958
1_01_A1_2	2015-07-31									D	002	D002	1	18	0.055556	-0.285342
1_01_A1_2	2015-07-31									D	003	D003	0	22	0	-0.522259
1_01_A1_2	2015-07-31									D	004	D004	0	20	0	-0.522259
1_01_A1_2	2015-07-31									D	005	D005	0	0	NaN	NaN
1_01_A1_2	2015-07-31									D	006	D006	2	13	0.153846	0.13382
1_01_A1_2	2015-07-31									D	007	D007	0	17	0	-0.522259
1_01_A1_2	2015-07-31									D	008	D008	2	7	0.285714	0.696174
1_01_A1_2	2015-07-31									D	009	D009	0	0	NaN	NaN
1_01_A1_2	2015-07-31									D	010	D010	1	10	0.1	-0.095808
1_01_A1_2	2015-07-31									D	011	D011	1	13	0.076923	-0.19422
1_01_A1_2	2015-07-31									D	012	D012	2	19	0.105263	-0.073363
1_01_A1_2	2015-07-31									E	001	E001	4	20	0.2	0.330644
1_01_A1_2	2015-07-31									E	002	E002	0	0	NaN	NaN
1_01_A1_2	2015-07-31									E	003	E003	0	22	0	-0.522259
1_01_A1_2	2015-07-31									E	004	E004	3	22	0.136364	0.059265
1_01_A1_2	2015-07-31									E	005	E005	1	10	0.1	-0.095808
1_01_A1_2	2015-07-31									E	006	E006	1	7	0.142857	0.086957
1_01_A1_2	2015-07-31									E	007	E007	0	0	NaN	NaN
1_01_A1_2	2015-07-31									E	008	E008	0	0	NaN	NaN
1_01_A1_2	2015-07-31									E	009	E009	0	0	NaN	NaN
1_01_A1_2	2015-07-31									E	010	E010	2	11	0.181818	0.253107
1_01_A1_2	2015-07-31									E	011	E011	2	21	0.095238	-0.116115
1_01_A1_2	2015-07-31									E	012	E012	0	18	0	-0.522259
1_01_A1_2	2015-07-31									F	001	F001	0	0	NaN	NaN
1_01_A1_2	2015-07-31									F	002	F002	1	11	0.090909	-0.134576
1_01_A1_2	2015-07-31									F	003	F003	1	12	0.083333	-0.166883
1_01_A1_2	2015-07-31									F	004	F004	6	25	0.24	0.501224
1_01_A1_2	2015-07-31									F	005	F005	2	18	0.111111	-0.048424
1_01_A1_2	2015-07-31									F	006	F006	0	11	0	-0.522259
1_01_A1_2	2015-07-31									F	007	F007	1	7	0.142857	0.086957
1_01_A1_2	2015-07-31		GFP						pos	F	008	F008	7	7	1	3.74226
1_01_A1_2	2015-07-31				dpy				neg	F	009	F009	2	11	0.181818	0.253107
1_01_A1_2	2015-07-31	L4440							neg	F	010	F010	0	12	0	-0.522259
1_01_A1_2	2015-07-31									F	011	F011	0	20	0	-0.522259
1_01_A1_2	2015-07-31							mek-2	pos	F	012	F012	13	14	0.928571	3.43765
1_01_A1_2	2015-07-31									G	001	G001	0	0	NaN	NaN
1_01_A1_2	2015-07-31									G	002	G002	0	8	0	-0.522259
1_01_A1_2	2015-07-31									G	003	G003	1	11	0.090909	-0.134576
1_01_A1_2	2015-07-31									G	004	G004	1	11	0.090909	-0.134576
1_01_A1_2	2015-07-31									G	005	G005	0	11	0	-0.522259
1_01_A1_2	2015-07-31			lag-1					pos	G	006	G006	1	2	0.5	1.61
1_01_A1_2	2015-07-31									G	007	G007	0	0	NaN	NaN
1_01_A1_2	2015-07-31									G	008	G008	0	6	0	-0.522259
1_01_A1_2	2015-07-31						mpk-1		pos	G	009	G009	10	10	1	3.74226
1_01_A1_2	2015-07-31									G	010	G010	1	9	0.111111	-0.048424
1_01_A1_2	2015-07-31									G	011	G011	0	10	0	-0.522259
1_01_A1_2	2015-07-31									G	012	G012	0	10	0	-0.522259
1_01_A1_2	2015-07-31									H	001	H001	1	6	0.166667	0.188493
1_01_A1_2	2015-07-31									H	002	H002	0	0	NaN	NaN
1_01_A1_2	2015-07-31									H	003	H003	0	16	0	-0.522259
1_01_A1_2	2015-07-31									H	004	H004	0	0	NaN	NaN
1_01_A1_2	2015-07-31									H	005	H005	2	11	0.181818	0.253107
1_01_A1_2	2015-07-31									H	006	H006	0	8	0	-0.522259
1_01_A1_2	2015-07-31					cye-1			pos	H	007	H007	1	12	0.083333	-0.166883
1_01_A1_2	2015-07-31									H	008	H008	10	11	0.909091	3.35457
1_01_A1_2	2015-07-31									H	009	H009	0	11	0	-0.522259
1_01_A1_2	2015-07-31									H	010	H010	2	9	0.222222	0.425411
1_01_A1_2	2015-07-31									H	011	H011	0	11	0	-0.522259
1_01_A1_2	2015-07-31									H	012	H012	0	10	0	-0.522259
1_01_A2_1	2016-05-23									A	001	A001	1	7	0.142857	0.124323
1_01_A2_1	2016-05-23									A	002	A002	0	0	NaN	NaN
1_01_A2_1	2016-05-23									A	003	A003	0	11	0	-0.553847
1_01_A2_1	2016-05-23	L4440							neg	A	004	A004	0	13	0	-0.553847
1_01_A2_1	2016-05-23									A	005	A005	1	15	0.066667	-0.237367
1_01_A2_1	2016-05-23		GFP						pos	A	006	A006	0	12	0	-0.553847
1_01_A2_1	2016-05-23									A	007	A007	1	12	0.083333	-0.158248
1_01_A2_1	2016-05-23									A	008	A008	0	13	0	-0.553847
1_01_A2_1	2016-05-23									A	009	A009	1	15	0.066667	-0.237367
1_01_A2_1	2016-05-23									A	010	A010	0	17	0	-0.553847
1_01_A2_1	2016-05-23									A	011	A011	0	12	0	-0.553847
1_01_A2_1	2016-05-23									A	012	A012	0	14	0	-0.553847
1_01_A2_1	2016-05-23									B	001	B001	1	10	0.1	-0.079128
1_01_A2_1	2016-05-23									B	002	B002	0	15	0	-0.553847
1_01_A2_1	2016-05-23									B	003	B003	1	7	0.142857	0.124323
1_01_A2_1	2016-05-23									B	004	B004	1	11	0.090909	-0.122284
1_01_A2_1	2016-05-23									B	005	B005	0	17	0	-0.553847
1_01_A2_1	2016-05-23									B	006	B006	0	8	0	-0.553847
1_01_A2_1	2016-05-23									B	007	B007	7	7	1	4.19334
1_01_A2_1	2016-05-23									B	008	B008	0	9	0	-0.553847
1_01_A2_1	2016-05-23									B	009	B009	0	0	NaN	NaN
1_01_A2_1	2016-05-23									B	010	B010	2	15	0.133333	0.079112
1_01_A2_1	2016-05-23									B	011	B011	0	11	0	-0.553847
1_01_A2_1	2016-05-23									B	012	B012	0	12	0	-0.553847
1_01_A2_1	2016-05-23									C	001	C001	1	14	0.071429	-0.214762
1_01_A2_1	2016-05-23									C	002	C002	0	0	NaN	NaN
1_01_A2_1	2016-05-23									C	003	C003	1	17	0.058824	-0.2746
1_01_A2_1	2016-05-23									C	004	C004	0	15	0	-0.553847
1_01_A2_1	2016-05-23									C	005	C005	0	22	0	-0.553847
1_01_A2_1	2016-05-23									C	006	C006	0	17	0	-0.553847
1_01_A2_1	2016-05-23									C	007	C007	0	9	0	-0.553847
1_01_A2_1	2016-05-23									C	008	C008	0	0	NaN	NaN
1_01_A2_1	2016-05-23				dpy				neg	C	009	C009	1	5	0.2	0.395591
1_01_A2_1	2016-05-23									C	010	C010	0	13	0	-0.553847
1_01_A2_1	2016-05-23					cye-1			pos	C	011	C011	0	9	0	-0.553847
1_01_A2_1	2016-05-23									C	012	C012	0	16	0	-0.553847
1_01_A2_1	2016-05-23									D	001	D001	3	16	0.1875	0.336251
1_01_A2_1	2016-05-23									D	002	D002	2	18	0.111111	-0.026381
1_01_A2_1	2016-05-23									D	003	D003	0	23	0	-0.553847
1_01_A2_1	2016-05-23									D	004	D004	2	20	0.1	-0.079128
1_01_A2_1	2016-05-23									D	005	D005	0	0	NaN	NaN
1_01_A2_1	2016-05-23									D	006	D006	3	13	0.230769	0.541658
1_01_A2_1	2016-05-23									D	007	D007	1	17	0.058824	-0.2746
1_01_A2_1	2016-05-23									D	008	D008	2	7	0.285714	0.802492
1_01_A2_1	2016-05-23									D	009	D009	0	0	NaN	NaN
1_01_A2_1	2016-05-23									D	010	D010	1	10	0.1	-0.079128
1_01_A2_1	2016-05-23									D	011	D011	1	13	0.076923	-0.188678
1_01_A2_1	2016-05-23									D	012	D012	2	19	0.105263	-0.054143
1_01_A2_1	2016-05-23									E	001	E001	5	21	0.238095	0.576436
1_01_A2_1	2016-05-23									E	002	E002	0	0	NaN	NaN
1_01_A2_1	2016-05-23									E	003	E003	1	22	0.045455	-0.338065
1_01_A2_1	2016-05-23									E	004	E004	2	21	0.095238	-0.101734
1_01_A2_1	2016-05-23									E	005	E005	1	9	0.111111	-0.026381
1_01_A2_1	2016-05-23									E	006	E006	2	7	0.285714	0.802492
1_01_A2_1	2016-05-23									E	007	E007	0	0	NaN	NaN
1_01_A2_1	2016-05-23									E	008	E008	0	0	NaN	NaN
1_01_A2_1	2016-05-23									E	009	E009	0	0	NaN	NaN
1_01_A2_1	2016-05-23									E	010	E010	2	10	0.2	0.395591
1_01_A2_1	2016-05-23									E	011	E011	2	21	0.095238	-0.101734
1_01_A2_1	2016-05-23									E	012	E012	0	17	0	-0.553847
1_01_A2_1	2016-05-23									F	001	F001	0	0	NaN	NaN
1_01_A2_1	2016-05-23									F	002	F002	1	11	0.090909	-0.122284
1_01_A2_1	2016-05-23									F	003	F003	0	11	0	-0.553847
1_01_A2_1	2016-05-23									F	004	F004	4	23	0.173913	0.271751
1_01_A2_1	2016-05-23									F	005	F005	2	17	0.117647	0.004646
1_01_A2_1	2016-05-23									F	006	F006	0	11	0	-0.553847
1_01_A2_1	2016-05-23									F	007	F007	1	8	0.125	0.039552
1_01_A2_1	2016-05-23						mpk-1		pos	F	008	F008	0	6	0	-0.553847
1_01_A2_1	2016-05-23									F	009	F009	1	10	0.1	-0.079128
1_01_A2_1	2016-05-23							mek-2	pos	F	010	F010	0	13	0	-0.553847
1_01_A2_1	2016-05-23									F	011	F011	0	20	0	-0.553847
1_01_A2_1	2016-05-23									F	012	F012	11	12	0.916667	3.79774
1_01_A2_1	2016-05-23									G	001	G001	0	0	NaN	NaN
1_01_A2_1	2016-05-23									G	002	G002	1	9	0.111111	-0.026381
1_01_A2_1	2016-05-23									G	003	G003	1	11	0.090909	-0.122284
1_01_A2_1	2016-05-23									G	004	G004	1	11	0.090909	-0.122284
1_01_A2_1	2016-05-23									G	005	G005	0	11	0	-0.553847
1_01_A2_1	2016-05-23									G	006	G006	1	2	0.5	1.81975
1_01_A2_1	2016-05-23									G	007	G007	0	0	NaN	NaN
1_01_A2_1	2016-05-23									G	008	G008	0	6	0	-0.553847
1_01_A2_1	2016-05-23									G	009	G009	10	10	1	4.19334
1_01_A2_1	2016-05-23									G	010	G010	1	9	0.111111	-0.026381
1_01_A2_1	2016-05-23									G	011	G011	0	10	0	-0.553847
1_01_A2_1	2016-05-23									G	012	G012	0	10	0	-0.553847
1_01_A2_1	2016-05-23									H	001	H001	1	6	0.166667	0.237351
1_01_A2_1	2016-05-23									H	002	H002	0	0	NaN	NaN
1_01_A2_1	2016-05-23									H	003	H003	0	16	0	-0.553847
1_01_A2_1	2016-05-23									H	004	H004	0	0	NaN	NaN
1_01_A2_1	2016-05-23									H	005	H005	1	10	0.1	-0.079128
1_01_A2_1	2016-05-23									H	006	H006	0	10	0	-0.553847
1_01_A2_1	2016-05-23									H	007	H007	1	12	0.083333	-0.158248
1_01_A2_1	2016-05-23									H	008	H008	7	8	0.875	3.59994
1_01_A2_1	2016-05-23			lag-1					pos	H	009	H009	1	11	0.090909	-0.122284
1_01_A2_1	2016-05-23									H	010	H010	2	9	0.222222	0.501084
1_01_A2_1	2016-05-23									H	011	H011	0	11	0	-0.553847
1_01_A2_1	2016-05-23									H	012	H012	0	10	0	-0.553847
1_01_A2_2	2016-05-23									A	001	A001	0	5	0	-0.526126
1_01_A2_2	2016-05-23									A	002	A002	0	10	0	-0.526126
1_01_A2_2	2016-05-23									A	003	A003	2	12	0.166667	0.286498
1_01_A2_2	2016-05-23	L4440							neg	A	004	A004	1	9	0.111111	0.015623
1_01_A2_2	2016-05-23									A	005	A005	0	14	0	-0.526126
1_01_A2_2	2016-05-23		GFP						pos	A	006	A006	8	8	1	4.34962
1_01_A2_2	2016-05-23									A	007	A007	0	10	0	-0.526126
1_01_A2_2	2016-05-23									A	008	A008	1	13	0.076923	-0.151069
1_01_A2_2	2016-05-23									A	009	A009	0	15	0	-0.526126
1_01_A2_2	2016-05-23									A	010	A010	0	8	0	-0.526126
1_01_A2_2	2016-05-23									A	011	A011	0	9	0	-0.526126
1_01_A2_2	2016-05-23									A	012	A012	4	5	0.8	3.37447
1_01_A2_2	2016-05-23									B	001	B001	0	12	0	-0.526126
1_01_A2_2	2016-05-23									B	002	B002	2	11	0.181818	0.360373
1_01_A2_2	2016-05-23									B	003	B003	2	13	0.153846	0.223988
1_01_A2_2	2016-05-23									B	004	B004	2	18	0.111111	0.015623
1_01_A2_2	2016-05-23									B	005	B005	6	19	0.315789	1.01358
1_01_A2_2	2016-05-23									B	006	B006	0	15	0	-0.526126
1_01_A2_2	2016-05-23									B	007	B007	1	10	0.1	-0.038552
1_01_A2_2	2016-05-23									B	008	B008	3	18	0.166667	0.286498
1_01_A2_2	2016-05-23									B	009	B009	0	6	0	-0.526126
1_01_A2_2	2016-05-23									B	010	B010	0	8	0	-0.526126
1_01_A2_2	2016-05-23									B	011	B011	0	10	0	-0.526126
1_01_A2_2	2016-05-23									B	012	B012	0	8	0	-0.526126
1_01_A2_2	2016-05-23									C	001	C001	0	11	0	-0.526126
1_01_A2_2	2016-05-23									C	002	C002	1	8	0.125	0.083342
1_01_A2_2	2016-05-23									C	003	C003	0	11	0	-0.526126
1_01_A2_2	2016-05-23									C	004	C004	0	9	0	-0.526126
1_01_A2_2	2016-05-23									C	005	C005	0	16	0	-0.526126
1_01_A2_2	2016-05-23									C	006	C006	0	10	0	-0.526126
1_01_A2_2	2016-05-23									C	007	C007	0	15	0	-0.526126
1_01_A2_2	2016-05-23									C	008	C008	4	21	0.190476	0.402587
1_01_A2_2	2016-05-23				dpy				neg	C	009	C009	3	15	0.2	0.449023
1_01_A2_2	2016-05-23									C	010	C010	2	8	0.25	0.69281
1_01_A2_2	2016-05-23					cye-1			pos	C	011	C011	0	9	0	-0.526126
1_01_A2_2	2016-05-23									C	012	C012	0	12	0	-0.526126
1_01_A2_2	2016-05-23									D	001	D001	1	8	0.125	0.083342
1_01_A2_2	2016-05-23									D	002	D002	1	15	0.066667	-0.201077
1_01_A2_2	2016-05-23									D	003	D003	3	15	0.2	0.449023
1_01_A2_2	2016-05-23									D	004	D004	0	15	0	-0.526126
1_01_A2_2	2016-05-23									D	005	D005	1	9	0.111111	0.015623
1_01_A2_2	2016-05-23									D	006	D006	1	8	0.125	0.083342
1_01_A2_2	2016-05-23									D	007	D007	1	9	0.111111	0.015623
1_01_A2_2	2016-05-23									D	008	D008	0	9	0	-0.526126
1_01_A2_2	2016-05-23									D	009	D009	1	8	0.125	0.083342
1_01_A2_2	2016-05-23									D	010	D010	2	15	0.133333	0.123973
1_01_A2_2	2016-05-23									D	011	D011	3	10	0.3	0.936597
1_01_A2_2	2016-05-23									D	012	D012	2	9	0.222222	0.557372
1_01_A2_2	2016-05-23									E	001	E001	0	8	0	-0.526126
1_01_A2_2	2016-05-23									E	002	E002	1	23	0.043478	-0.314137
1_01_A2_2	2016-05-23									E	003	E003	3	17	0.176471	0.334299
1_01_A2_2	2016-05-23									E	004	E004	2	22	0.090909	-0.082877
1_01_A2_2	2016-05-23									E	005	E005	0	7	0	-0.526126
1_01_A2_2	2016-05-23									E	006	E006	1	8	0.125	0.083342
1_01_A2_2	2016-05-23									E	007	E007	0	14	0	-0.526126
1_01_A2_2	2016-05-23									E	008	E008	1	14	0.071429	-0.177859
1_01_A2_2	2016-05-23									E	009	E009	1	13	0.076923	-0.151069
1_01_A2_2	2016-05-23									E	010	E010	0	12	0	-0.526126
1_01_A2_2	2016-05-23									E	011	E011	0	16	0	-0.526126
1_01_A2_2	2016-05-23									E	012	E012	0	10	0	-0.526126
1_01_A2_2	2016-05-23									F	001	F001	0	10	0	-0.526126
1_01_A2_2	2016-05-23									F	002	F002	2	17	0.117647	0.047491
1_01_A2_2	2016-05-23									F	003	F003	0	9	0	-0.526126
1_01_A2_2	2016-05-23									F	004	F004	0	10	0	-0.526126
1_01_A2_2	2016-05-23									F	005	F005	8	18	0.444444	1.64087
1_01_A2_2	2016-05-23									F	006	F006	0	0	NaN	NaN
1_01_A2_2	2016-05-23									F	007	F007	0	7	0	-0.526126
1_01_A2_2	2016-05-23						mpk-1		pos	F	008	F008	0	0	NaN	NaN
1_01_A2_2	2016-05-23									F	009	F009	0	13	0	-0.526126
1_01_A2_2	2016-05-23							mek-2	pos	F	010	F010	10	10	1	4.34962
1_01_A2_2	2016-05-23									F	011	F011	0	10	0	-0.526126
1_01_A2_2	2016-05-23									F	012	F012	2	10	0.2	0.449023
1_01_A2_2	2016-05-23									G	001	G001	1	10	0.1	-0.038552
1_01_A2_2	2016-05-23									G	002	G002	1	11	0.090909	-0.082877
1_01_A2_2	2016-05-23									G	003	G003	0	7	0	-0.526126
1_01_A2_2	2016-05-23									G	004	G004	0	8	0	-0.526126
1_01_A2_2	2016-05-23									G	005	G005	0	12	0	-0.526126
1_01_A2_2	2016-05-23									G	006	G006	0	3	0	-0.526126
1_01_A2_2	2016-05-23									G	007	G007	0	8	0	-0.526126
1_01_A2_2	2016-05-23									G	008	G008	1	5	0.2	0.449023
1_01_A2_2	2016-05-23									G	009	G009	0	8	0	-0.526126
1_01_A2_2	2016-05-23									G	010	G010	2	10	0.2	0.449023
1_01_A2_2	2016-05-23									G	011	G011	0	12	0	-0.526126
1_01_A2_2	2016-05-23									G	012	G012	0	12	0	-0.526126
1_01_A2_2	2016-05-23									H	001	H001	1	12	0.083333	-0.119814
1_01_A2_2	2016-05-23									H	002	H002	1	13	0.076923	-0.151069
1_01_A2_2	2016-05-23									H	003	H003	0	10	0	-0.526126
1_01_A2_2	2016-05-23									H	004	H004	0	7	0	-0.526126
1_01_A2_2	2016-05-23									H	005	H005	0	9	0	-0.526126
1_01_A2_2	2016-05-23									H	006	H006	0	8	0	-0.526126
1_01_A2_2	2016-05-23									H	007	H007	0	1	0	-0.526126
1_01_A2_2	2016-05-23									H	008	H008	1	2	0.5	1.91175
1_01_A2_2	2016-05-23			lag-1					pos	H	009	H009	3	3	1	4.34962
1_01_A2_2	2016-05-23									H	010	H010	1	13	0.076923	-0.151069
1_01_A2_2	2016-05-23									H	011	H011	0	9	0	-0.526126
1_01_A2_2	2016-05-23									H	012	H012	0	8	0	-0.526126
1_01_B1_1	2015-07-31		GFP						pos	A	001	A001	1	3	0.333333	0.820545
1_01_B1_1	2015-07-31									A	002	A002	1	7	0.142857	-0.004524
1_01_B1_1	2015-07-31									A	003	A003	1	12	0.083333	-0.262358
1_01_B1_1	2015-07-31									A	004	A004	0	12	0	-0.623326
1_01_B1_1	2015-07-31				dpy				neg	A	005	A005	0	18	0	-0.623326
1_01_B1_1	2015-07-31									A	006	A006	0	0	NaN	NaN
1_01_B1_1	2015-07-31									A	007	A007	0	20	0	-0.623326
1_01_B1_1	2015-07-31									A	008	A008	2	18	0.111111	-0.142036
1_01_B1_1	2015-07-31									A	009	A009	0	22	0	-0.623326
1_01_B1_1	2015-07-31									A	010	A010	3	14	0.214286	0.304877
1_01_B1_1	2015-07-31									A	011	A011	0	9	0	-0.623326
1_01_B1_1	2015-07-31									A	012	A012	0	8	0	-0.623326
1_01_B1_1	2015-07-31							mek-2	pos	B	001	B001	5	5	1	3.70829
1_01_B1_1	2015-07-31									B	002	B002	0	11	0	-0.623326
1_01_B1_1	2015-07-31									B	003	B003	2	14	0.142857	-0.004524
1_01_B1_1	2015-07-31									B	004	B004	1	24	0.041667	-0.442842
1_01_B1_1	2015-07-31									B	005	B005	1	14	0.071429	-0.313925
1_01_B1_1	2015-07-31									B	006	B006	0	13	0	-0.623326
1_01_B1_1	2015-07-31									B	007	B007	2	9	0.222222	0.339255
1_01_B1_1	2015-07-31									B	008	B008	1	17	0.058824	-0.368525
1_01_B1_1	2015-07-31									B	009	B009	0	0	NaN	NaN
1_01_B1_1	2015-07-31									B	010	B010	1	14	0.071429	-0.313925
1_01_B1_1	2015-07-31									B	011	B011	2	12	0.166667	0.09861
1_01_B1_1	2015-07-31									B	012	B012	0	12	0	-0.623326
1_01_B1_1	2015-07-31									C	001	C001	1	12	0.083333	-0.262358
1_01_B1_1	2015-07-31									C	002	C002	0	15	0	-0.623326
1_01_B1_1	2015-07-31									C	003	C003	2	21	0.095238	-0.210791
1_01_B1_1	2015-07-31	L4440							neg	C	004	C004	2	16	0.125	-0.081874
1_01_B1_1	2015-07-31									C	005	C005	2	14	0.142857	-0.004524
1_01_B1_1	2015-07-31									C	006	C006	2	14	0.142857	-0.004524
1_01_B1_1	2015-07-31									C	007	C007	4	25	0.16	0.069732
1_01_B1_1	2015-07-31									C	008	C008	0	10	0	-0.623326
1_01_B1_1	2015-07-31									C	009	C009	0	4	0	-0.623326
1_01_B1_1	2015-07-31					cye-1			pos	C	010	C010	9	9	1	3.70829
1_01_B1_1	2015-07-31						mpk-1		pos	C	011	C011	1	14	0.071429	-0.313925
1_01_B1_1	2015-07-31									C	012	C012	0	10	0	-0.623326
1_01_B1_1	2015-07-31			lag-1					pos	D	001	D001	14	14	1	3.70829
1_01_B1_1	2015-07-31									D	002	D002	1	16	0.0625	-0.3526
1_01_B1_1	2015-07-31									D	003	D003	0	13	0	-0.623326
1_01_B1_1	2015-07-31									D	004	D004	0	11	0	-0.623326
1_01_B1_1	2015-07-31									D	005	D005	2	10	0.2	0.242997
1_01_B1_1	2015-07-31									D	006	D006	0	10	0	-0.623326
1_01_B1_1	2015-07-31									D	007	D007	0	0	NaN	NaN
1_01_B1_1	2015-07-31									D	008	D008	0	0	NaN	NaN
1_01_B1_1	2015-07-31									D	009	D009	1	11	0.090909	-0.229543
1_01_B1_1	2015-07-31									D	010	D010	3	16	0.1875	0.188851
1_01_B1_1	2015-07-31									D	011	D011	4	23	0.173913	0.129998
1_01_B1_1	2015-07-31									D	012	D012	0	18	0	-0.623326
1_01_B1_1	2015-07-31									E	001	E001	1	13	0.076923	-0.290125
1_01_B1_1	2015-07-31									E	002	E002	4	19	0.210526	0.288592
1_01_B1_1	2015-07-31									E	003	E003	2	13	0.153846	0.043076
1_01_B1_1	2015-07-31									E	004	E004	4	20	0.2	0.242997
1_01_B1_1	2015-07-31									E	005	E005	0	10	0	-0.623326
1_01_B1_1	2015-07-31									E	006	E006	2	12	0.166667	0.09861
1_01_B1_1	2015-07-31									E	007	E007	2	13	0.153846	0.043076
1_01_B1_1	2015-07-31									E	008	E008	0	16	0	-0.623326
1_01_B1_1	2015-07-31									E	009	E009	0	11	0	-0.623326
1_01_B1_1	2015-07-31									E	010	E010	0	0	NaN	NaN
1_01_B1_1	2015-07-31									E	011	E011	1	15	0.066667	-0.334552
1_01_B1_1	2015-07-31									E	012	E012	1	18	0.055556	-0.382681
1_01_B1_1	2015-07-31									F	001	F001	3	13	0.230769	0.376277
1_01_B1_1	2015-07-31									F	002	F002	0	18	0	-0.623326
1_01_B1_1	2015-07-31									F	003	F003	1	10	0.1	-0.190165
1_01_B1_1	2015-07-31									F	004	F004	3	17	0.176471	0.141076
1_01_B1_1	2015-07-31									F	005	F005	1	8	0.125	-0.081874
1_01_B1_1	2015-07-31									F	006	F006	0	6	0	-0.623326
1_01_B1_1	2015-07-31									F	007	F007	0	0	NaN	NaN
1_01_B1_1	2015-07-31									F	008	F008	1	14	0.071429	-0.313925
1_01_B1_1	2015-07-31									F	009	F009	0	0	NaN	NaN
1_01_B1_1	2015-07-31									F	010	F010	0	7	0	-0.623326
1_01_B1_1	2015-07-31									F	011	F011	0	10	0	-0.623326
1_01_B1_1	2015-07-31									F	012	F012	1	16	0.0625	-0.3526
1_01_B1_1	2015-07-31									G	001	G001	2	8	0.25	0.459577
1_01_B1_1	2015-07-31									G	002	G002	0	0	NaN	NaN
1_01_B1_1	2015-07-31									G	003	G003	0	10	0	-0.623326
1_01_B1_1	2015-07-31									G	004	G004	3	12	0.25	0.459577
1_01_B1_1	2015-07-31									G	005	G005	4	9	0.444444	1.30184
1_01_B1_1	2015-07-31									G	006	G006	1	8	0.125	-0.081874
1_01_B1_1	2015-07-31									G	007	G007	0	11	0	-0.623326
1_01_B1_1	2015-07-31									G	008	G008	0	11	0	-0.623326
1_01_B1_1	2015-07-31									G	009	G009	4	4	1	3.70829
1_01_B1_1	2015-07-31									G	010	G010	1	7	0.142857	-0.004524
1_01_B1_1	2015-07-31									G	011	G011	2	2	1	3.70829
1_01_B1_1	2015-07-31									G	012	G012	2	16	0.125	-0.081874
1_01_B1_1	2015-07-31									H	001	H001	0	12	0	-0.623326
1_01_B1_1	2015-07-31									H	002	H002	1	11	0.090909	-0.229543
1_01_B1_1	2015-07-31									H	003	H003	1	12	0.083333	-0.262358
1_01_B1_1	2015-07-31									H	004	H004	1	17	0.058824	-0.368525
1_01_B1_1	2015-07-31									H	005	H005	2	9	0.222222	0.339255
1_01_B1_1	2015-07-31									H	006	H006	1	8	0.125	-0.081874
1_01_B1_1	2015-07-31									H	007	H007	2	6	0.333333	0.820545
1_01_B1_1	2015-07-31									H	008	H008	1	5	0.2	0.242997
1_01_B1_1	2015-07-31									H	009	H009	1	6	0.166667	0.09861
1_01_B1_1	2015-07-31									H	010	H010	0	7	0	-0.623326
1_01_B1_1	2015-07-31									H	011	H011	0	8	0	-0.623326
1_01_B1_1	2015-07-31									H	012	H012	0	17	0	-0.623326
1_01_B1_2	2015-07-31		GFP						pos	A	001	A001	2	4	0.5	1.96539
1_01_B1_2	2015-07-31									A	002	A002	0	6	0	-0.592512
1_01_B1_2	2015-07-31									A	003	A003	0	11	0	-0.592512
1_01_B1_2	2015-07-31									A	004	A004	0	12	0	-0.592512
1_01_B1_2	2015-07-31				dpy				neg	A	005	A005	0	13	0	-0.592512
1_01_B1_2	2015-07-31									A	006	A006	0	0	NaN	NaN
1_01_B1_2	2015-07-31									A	007	A007	1	14	0.071429	-0.227097
1_01_B1_2	2015-07-31									A	008	A008	0	19	0	-0.592512
1_01_B1_2	2015-07-31									A	009	A009	1	15	0.066667	-0.251458
1_01_B1_2	2015-07-31									A	010	A010	1	15	0.066667	-0.251458
1_01_B1_2	2015-07-31									A	011	A011	1	12	0.083333	-0.166194
1_01_B1_2	2015-07-31									A	012	A012	1	11	0.090909	-0.127438
1_01_B1_2	2015-07-31							mek-2	pos	B	001	B001	4	4	1	4.5233
1_01_B1_2	2015-07-31									B	002	B002	0	5	0	-0.592512
1_01_B1_2	2015-07-31									B	003	B003	0	10	0	-0.592512
1_01_B1_2	2015-07-31									B	004	B004	0	9	0	-0.592512
1_01_B1_2	2015-07-31									B	005	B005	1	19	0.052632	-0.323258
1_01_B1_2	2015-07-31									B	006	B006	1	14	0.071429	-0.227097
1_01_B1_2	2015-07-31									B	007	B007	1	12	0.083333	-0.166194
1_01_B1_2	2015-07-31									B	008	B008	1	10	0.1	-0.080931
1_01_B1_2	2015-07-31									B	009	B009	0	0	NaN	NaN
1_01_B1_2	2015-07-31									B	010	B010	0	11	0	-0.592512
1_01_B1_2	2015-07-31									B	011	B011	1	6	0.166667	0.260123
1_01_B1_2	2015-07-31									B	012	B012	0	11	0	-0.592512
1_01_B1_2	2015-07-31									C	001	C001	0	8	0	-0.592512
1_01_B1_2	2015-07-31									C	002	C002	0	9	0	-0.592512
1_01_B1_2	2015-07-31									C	003	C003	1	12	0.083333	-0.166194
1_01_B1_2	2015-07-31	L4440							neg	C	004	C004	0	16	0	-0.592512
1_01_B1_2	2015-07-31									C	005	C005	4	24	0.166667	0.260123
1_01_B1_2	2015-07-31									C	006	C006	1	11	0.090909	-0.127438
1_01_B1_2	2015-07-31									C	007	C007	0	12	0	-0.592512
1_01_B1_2	2015-07-31									C	008	C008	0	7	0	-0.592512
1_01_B1_2	2015-07-31									C	009	C009	2	11	0.181818	0.337635
1_01_B1_2	2015-07-31					cye-1			pos	C	010	C010	7	7	1	4.5233
1_01_B1_2	2015-07-31						mpk-1		pos	C	011	C011	1	12	0.083333	-0.166194
1_01_B1_2	2015-07-31									C	012	C012	1	18	0.055556	-0.3083
1_01_B1_2	2015-07-31			lag-1					pos	D	001	D001	12	13	0.923077	4.12977
1_01_B1_2	2015-07-31									D	002	D002	0	7	0	-0.592512
1_01_B1_2	2015-07-31									D	003	D003	3	13	0.230769	0.58806
1_01_B1_2	2015-07-31									D	004	D004	2	9	0.222222	0.544335
1_01_B1_2	2015-07-31									D	005	D005	3	13	0.230769	0.58806
1_01_B1_2	2015-07-31									D	006	D006	0	14	0	-0.592512
1_01_B1_2	2015-07-31									D	007	D007	0	0	NaN	NaN
1_01_B1_2	2015-07-31									D	008	D008	0	0	NaN	NaN
1_01_B1_2	2015-07-31									D	009	D009	1	12	0.083333	-0.166194
1_01_B1_2	2015-07-31									D	010	D010	0	9	0	-0.592512
1_01_B1_2	2015-07-31									D	011	D011	1	11	0.090909	-0.127438
1_01_B1_2	2015-07-31									D	012	D012	2	16	0.125	0.046965
1_01_B1_2	2015-07-31									E	001	E001	0	10	0	-0.592512
1_01_B1_2	2015-07-31									E	002	E002	1	17	0.058824	-0.291582
1_01_B1_2	2015-07-31									E	003	E003	1	11	0.090909	-0.127438
1_01_B1_2	2015-07-31									E	004	E004	2	13	0.153846	0.194536
1_01_B1_2	2015-07-31									E	005	E005	3	14	0.214286	0.503733
1_01_B1_2	2015-07-31									E	006	E006	1	8	0.125	0.046965
1_01_B1_2	2015-07-31									E	007	E007	3	14	0.214286	0.503733
1_01_B1_2	2015-07-31									E	008	E008	3	16	0.1875	0.366703
1_01_B1_2	2015-07-31									E	009	E009	0	11	0	-0.592512
1_01_B1_2	2015-07-31									E	010	E010	0	0	NaN	NaN
1_01_B1_2	2015-07-31									E	011	E011	1	9	0.111111	-0.024088
1_01_B1_2	2015-07-31									E	012	E012	1	15	0.066667	-0.251458
1_01_B1_2	2015-07-31									F	001	F001	0	9	0	-0.592512
1_01_B1_2	2015-07-31									F	002	F002	0	6	0	-0.592512
1_01_B1_2	2015-07-31									F	003	F003	2	9	0.222222	0.544335
1_01_B1_2	2015-07-31									F	004	F004	0	15	0	-0.592512
1_01_B1_2	2015-07-31									F	005	F005	1	12	0.083333	-0.166194
1_01_B1_2	2015-07-31									F	006	F006	0	6	0	-0.592512
1_01_B1_2	2015-07-31									F	007	F007	0	0	NaN	NaN
1_01_B1_2	2015-07-31									F	008	F008	0	14	0	-0.592512
1_01_B1_2	2015-07-31									F	009	F009	0	0	NaN	NaN
1_01_B1_2	2015-07-31									F	010	F010	1	13	0.076923	-0.198988
1_01_B1_2	2015-07-31									F	011	F011	1	9	0.111111	-0.024088
1_01_B1_2	2015-07-31									F	012	F012	1	16	0.0625	-0.272773
1_01_B1_2	2015-07-31									G	001	G001	1	6	0.166667	0.260123
1_01_B1_2	2015-07-31									G	002	G002	0	0	NaN	NaN
1_01_B1_2	2015-07-31									G	003	G003	0	7	0	-0.592512
1_01_B1_2	2015-07-31									G	004	G004	0	15	0	-0.592512
1_01_B1_2	2015-07-31									G	005	G005	4	10	0.4	1.45381
1_01_B1_2	2015-07-31									G	006	G006	0	1	0	-0.592512
1_01_B1_2	2015-07-31									G	007	G007	0	3	0	-0.592512
1_01_B1_2	2015-07-31									G	008	G008	1	5	0.2	0.43065
1_01_B1_2	2015-07-31									G	009	G009	4	8	0.5	1.96539
1_01_B1_2	2015-07-31									G	010	G010	3	15	0.2	0.43065
1_01_B1_2	2015-07-31									G	011	G011	0	1	0	-0.592512
1_01_B1_2	2015-07-31									G	012	G012	0	15	0	-0.592512
1_01_B1_2	2015-07-31									H	001	H001	0	10	0	-0.592512
1_01_B1_2	2015-07-31									H	002	H002	0	7	0	-0.592512
1_01_B1_2	2015-07-31									H	003	H003	0	7	0	-0.592512
1_01_B1_2	2015-07-31									H	004	H004	0	12	0	-0.592512
1_01_B1_2	2015-07-31									H	005	H005	2	15	0.133333	0.089596
1_01_B1_2	2015-07-31									H	006	H006	0	11	0	-0.592512
1_01_B1_2	2015-07-31									H	007	H007	0	3	0	-0.592512
1_01_B1_2	2015-07-31									H	008	H008	1	7	0.142857	0.138318
1_01_B1_2	2015-07-31									H	009	H009	1	8	0.125	0.046965
1_01_B1_2	2015-07-31									H	010	H010	2	8	0.25	0.686441
1_01_B1_2	2015-07-31									H	011	H011	3	8	0.375	1.32592
1_01_B1_2	2015-07-31									H	012	H012	0	9	0	-0.592512
1_01_B2_1	2016-06-07	L4440							neg	A	001	A001	1	11	0.090909	-0.620802
1_01_B2_1	2016-06-07									A	002	A002	2	11	0.181818	-0.211149
1_01_B2_1	2016-06-07									A	003	A003	1	10	0.1	-0.579837
1_01_B2_1	2016-06-07									A	004	A004	1	4	0.25	0.096091
1_01_B2_1	2016-06-07									A	005	A005	0	2	0	-1.03046
1_01_B2_1	2016-06-07									A	006	A006	3	5	0.6	1.67326
1_01_B2_1	2016-06-07									A	007	A007	2	7	0.285714	0.257026
1_01_B2_1	2016-06-07									A	008	A008	0	6	0	-1.03046
1_01_B2_1	2016-06-07									A	009	A009	2	10	0.2	-0.129218
1_01_B2_1	2016-06-07									A	010	A010	3	9	0.333333	0.471607
1_01_B2_1	2016-06-07									A	011	A011	1	7	0.142857	-0.386715
1_01_B2_1	2016-06-07									A	012	A012	0	11	0	-1.03046
1_01_B2_1	2016-06-07									B	001	B001	1	3	0.333333	0.471607
1_01_B2_1	2016-06-07									B	002	B002	0	1	0	-1.03046
1_01_B2_1	2016-06-07									B	003	B003	1	1	1	3.47573
1_01_B2_1	2016-06-07									B	004	B004	1	2	0.5	1.22264
1_01_B2_1	2016-06-07									B	005	B005	0	1	0	-1.03046
1_01_B2_1	2016-06-07									B	006	B006	1	2	0.5	1.22264
1_01_B2_1	2016-06-07									B	007	B007	0	3	0	-1.03046
1_01_B2_1	2016-06-07									B	008	B008	0	1	0	-1.03046
1_01_B2_1	2016-06-07									B	009	B009	0	0	NaN	NaN
1_01_B2_1	2016-06-07									B	010	B010	1	3	0.333333	0.471607
1_01_B2_1	2016-06-07									B	011	B011	3	7	0.428571	0.900767
1_01_B2_1	2016-06-07									B	012	B012	2	12	0.166667	-0.279425
1_01_B2_1	2016-06-07				dpy				neg	C	001	C001	0	5	0	-1.03046
1_01_B2_1	2016-06-07									C	002	C002	1	10	0.1	-0.579837
1_01_B2_1	2016-06-07									C	003	C003	0	0	NaN	NaN
1_01_B2_1	2016-06-07									C	004	C004	0	5	0	-1.03046
1_01_B2_1	2016-06-07									C	005	C005	1	5	0.2	-0.129218
1_01_B2_1	2016-06-07									C	006	C006	0	0	NaN	NaN
1_01_B2_1	2016-06-07									C	007	C007	2	8	0.25	0.096091
1_01_B2_1	2016-06-07									C	008	C008	1	7	0.142857	-0.386715
1_01_B2_1	2016-06-07									C	009	C009	1	3	0.333333	0.471607
1_01_B2_1	2016-06-07									C	010	C010	0	0	NaN	NaN
1_01_B2_1	2016-06-07									C	011	C011	1	5	0.2	-0.129218
1_01_B2_1	2016-06-07									C	012	C012	0	1	0	-1.03046
1_01_B2_1	2016-06-07									D	001	D001	1	9	0.111111	-0.529768
1_01_B2_1	2016-06-07									D	002	D002	2	7	0.285714	0.257026
1_01_B2_1	2016-06-07									D	003	D003	2	8	0.25	0.096091
1_01_B2_1	2016-06-07									D	004	D004	1	8	0.125	-0.467182
1_01_B2_1	2016-06-07									D	005	D005	2	6	0.333333	0.471607
1_01_B2_1	2016-06-07									D	006	D006	2	6	0.333333	0.471607
1_01_B2_1	2016-06-07		GFP						pos	D	007	D007	6	6	1	3.47573
1_01_B2_1	2016-06-07									D	008	D008	1	3	0.333333	0.471607
1_01_B2_1	2016-06-07									D	009	D009	0	4	0	-1.03046
1_01_B2_1	2016-06-07									D	010	D010	0	5	0	-1.03046
1_01_B2_1	2016-06-07									D	011	D011	1	3	0.333333	0.471607
1_01_B2_1	2016-06-07									D	012	D012	1	4	0.25	0.096091
1_01_B2_1	2016-06-07					cye-1			pos	E	001	E001	9	9	1	3.47573
1_01_B2_1	2016-06-07									E	002	E002	0	9	0	-1.03046
1_01_B2_1	2016-06-07									E	003	E003	1	7	0.142857	-0.386715
1_01_B2_1	2016-06-07									E	004	E004	1	5	0.2	-0.129218
1_01_B2_1	2016-06-07									E	005	E005	2	8	0.25	0.096091
1_01_B2_1	2016-06-07									E	006	E006	1	6	0.166667	-0.279425
1_01_B2_1	2016-06-07									E	007	E007	3	9	0.333333	0.471607
1_01_B2_1	2016-06-07									E	008	E008	0	7	0	-1.03046
1_01_B2_1	2016-06-07									E	009	E009	1	5	0.2	-0.129218
1_01_B2_1	2016-06-07									E	010	E010	0	9	0	-1.03046
1_01_B2_1	2016-06-07									E	011	E011	0	7	0	-1.03046
1_01_B2_1	2016-06-07									E	012	E012	1	10	0.1	-0.579837
1_01_B2_1	2016-06-07									F	001	F001	4	8	0.5	1.22264
1_01_B2_1	2016-06-07			lag-1					pos	F	002	F002	5	6	0.833333	2.7247
1_01_B2_1	2016-06-07									F	003	F003	4	10	0.4	0.772019
1_01_B2_1	2016-06-07									F	004	F004	0	4	0	-1.03046
1_01_B2_1	2016-06-07									F	005	F005	2	6	0.333333	0.471607
1_01_B2_1	2016-06-07									F	006	F006	1	8	0.125	-0.467182
1_01_B2_1	2016-06-07									F	007	F007	0	2	0	-1.03046
1_01_B2_1	2016-06-07									F	008	F008	1	10	0.1	-0.579837
1_01_B2_1	2016-06-07									F	009	F009	2	11	0.181818	-0.211149
1_01_B2_1	2016-06-07									F	010	F010	2	8	0.25	0.096091
1_01_B2_1	2016-06-07									F	011	F011	2	7	0.285714	0.257026
1_01_B2_1	2016-06-07									F	012	F012	2	5	0.4	0.772019
1_01_B2_1	2016-06-07									G	001	G001	1	9	0.111111	-0.529768
1_01_B2_1	2016-06-07									G	002	G002	0	6	0	-1.03046
1_01_B2_1	2016-06-07									G	003	G003	1	6	0.166667	-0.279425
1_01_B2_1	2016-06-07									G	004	G004	2	11	0.181818	-0.211149
1_01_B2_1	2016-06-07									G	005	G005	2	6	0.333333	0.471607
1_01_B2_1	2016-06-07									G	006	G006	4	8	0.5	1.22264
1_01_B2_1	2016-06-07									G	007	G007	3	6	0.5	1.22264
1_01_B2_1	2016-06-07									G	008	G008	3	8	0.375	0.659364
1_01_B2_1	2016-06-07									G	009	G009	2	5	0.4	0.772019
1_01_B2_1	2016-06-07						mpk-1		pos	G	010	G010	1	2	0.5	1.22264
1_01_B2_1	2016-06-07							mek-2	pos	G	011	G011	2	8	0.25	0.096091
1_01_B2_1	2016-06-07									G	012	G012	0	5	0	-1.03046
1_01_B2_1	2016-06-07									H	001	H001	3	17	0.176471	-0.235246
1_01_B2_1	2016-06-07									H	002	H002	0	4	0	-1.03046
1_01_B2_1	2016-06-07									H	003	H003	2	8	0.25	0.096091
1_01_B2_1	2016-06-07									H	004	H004	1	13	0.076923	-0.683826
1_01_B2_1	2016-06-07									H	005	H005	1	8	0.125	-0.467182
1_01_B2_1	2016-06-07									H	006	H006	1	7	0.142857	-0.386715
1_01_B2_1	2016-06-07									H	007	H007	0	10	0	-1.03046
1_01_B2_1	2016-06-07									H	008	H008	5	12	0.416667	0.847122
1_01_B2_1	2016-06-07									H	009	H009	1	6	0.166667	-0.279425
1_01_B2_1	2016-06-07									H	010	H010	3	12	0.25	0.096091
1_01_B2_1	2016-06-07									H	011	H011	2	7	0.285714	0.257026
1_01_B2_1	2016-06-07									H	012	H012	0	3	0	-1.03046
1_01_B2_2	2016-06-07	L4440							neg	A	001	A001	0	4	0	-0.746019
1_01_B2_2	2016-06-07									A	002	A002	1	10	0.1	-0.284259
1_01_B2_2	2016-06-07									A	003	A003	0	6	0	-0.746019
1_01_B2_2	2016-06-07									A	004	A004	4	7	0.571429	1.89261
1_01_B2_2	2016-06-07									A	005	A005	1	3	0.333333	0.793183
1_01_B2_2	2016-06-07									A	006	A006	2	3	0.666667	2.33239
1_01_B2_2	2016-06-07									A	007	A007	1	7	0.142857	-0.086361
1_01_B2_2	2016-06-07									A	008	A008	0	4	0	-0.746019
1_01_B2_2	2016-06-07									A	009	A009	0	3	0	-0.746019
1_01_B2_2	2016-06-07									A	010	A010	0	4	0	-0.746019
1_01_B2_2	2016-06-07									A	011	A011	0	3	0	-0.746019
1_01_B2_2	2016-06-07									A	012	A012	1	2	0.5	1.56279
1_01_B2_2	2016-06-07									B	001	B001	0	1	0	-0.746019
1_01_B2_2	2016-06-07									B	002	B002	1	5	0.2	0.177502
1_01_B2_2	2016-06-07									B	003	B003	0	3	0	-0.746019
1_01_B2_2	2016-06-07									B	004	B004	1	3	0.333333	0.793183
1_01_B2_2	2016-06-07									B	005	B005	1	4	0.25	0.408383
1_01_B2_2	2016-06-07									B	006	B006	0	3	0	-0.746019
1_01_B2_2	2016-06-07									B	007	B007	2	3	0.666667	2.33239
1_01_B2_2	2016-06-07									B	008	B008	1	3	0.333333	0.793183
1_01_B2_2	2016-06-07									B	009	B009	0	0	NaN	NaN
1_01_B2_2	2016-06-07									B	010	B010	0	3	0	-0.746019
1_01_B2_2	2016-06-07									B	011	B011	1	2	0.5	1.56279
1_01_B2_2	2016-06-07									B	012	B012	1	2	0.5	1.56279
1_01_B2_2	2016-06-07				dpy				neg	C	001	C001	0	1	0	-0.746019
1_01_B2_2	2016-06-07									C	002	C002	0	3	0	-0.746019
1_01_B2_2	2016-06-07									C	003	C003	0	0	NaN	NaN
1_01_B2_2	2016-06-07									C	004	C004	1	5	0.2	0.177502
1_01_B2_2	2016-06-07									C	005	C005	0	3	0	-0.746019
1_01_B2_2	2016-06-07									C	006	C006	1	2	0.5	1.56279
1_01_B2_2	2016-06-07									C	007	C007	0	3	0	-0.746019
1_01_B2_2	2016-06-07									C	008	C008	0	2	0	-0.746019
1_01_B2_2	2016-06-07									C	009	C009	0	3	0	-0.746019
1_01_B2_2	2016-06-07									C	010	C010	0	0	NaN	NaN
1_01_B2_2	2016-06-07									C	011	C011	0	2	0	-0.746019
1_01_B2_2	2016-06-07									C	012	C012	0	1	0	-0.746019
1_01_B2_2	2016-06-07									D	001	D001	1	4	0.25	0.408383
1_01_B2_2	2016-06-07									D	002	D002	0	1	0	-0.746019
1_01_B2_2	2016-06-07									D	003	D003	1	4	0.25	0.408383
1_01_B2_2	2016-06-07									D	004	D004	0	2	0	-0.746019
1_01_B2_2	2016-06-07									D	005	D005	0	2	0	-0.746019
1_01_B2_2	2016-06-07									D	006	D006	0	3	0	-0.746019
1_01_B2_2	2016-06-07		GFP						pos	D	007	D007	4	4	1	3.87159
1_01_B2_2	2016-06-07									D	008	D008	0	4	0	-0.746019
1_01_B2_2	2016-06-07									D	009	D009	1	4	0.25	0.408383
1_01_B2_2	2016-06-07									D	010	D010	0	1	0	-0.746019
1_01_B2_2	2016-06-07									D	011	D011	0	1	0	-0.746019
1_01_B2_2	2016-06-07									D	012	D012	0	3	0	-0.746019
1_01_B2_2	2016-06-07					cye-1			pos	E	001	E001	7	8	0.875	3.29439
1_01_B2_2	2016-06-07									E	002	E002	1	7	0.142857	-0.086361
1_01_B2_2	2016-06-07									E	003	E003	0	3	0	-0.746019
1_01_B2_2	2016-06-07									E	004	E004	0	5	0	-0.746019
1_01_B2_2	2016-06-07									E	005	E005	0	5	0	-0.746019
1_01_B2_2	2016-06-07									E	006	E006	0	4	0	-0.746019
1_01_B2_2	2016-06-07									E	007	E007	1	5	0.2	0.177502
1_01_B2_2	2016-06-07									E	008	E008	0	2	0	-0.746019
1_01_B2_2	2016-06-07									E	009	E009	1	9	0.111111	-0.232952
1_01_B2_2	2016-06-07									E	010	E010	0	3	0	-0.746019
1_01_B2_2	2016-06-07									E	011	E011	0	3	0	-0.746019
1_01_B2_2	2016-06-07									E	012	E012	2	9	0.222222	0.280116
1_01_B2_2	2016-06-07									F	001	F001	0	8	0	-0.746019
1_01_B2_2	2016-06-07			lag-1					pos	F	002	F002	1	2	0.5	1.56279
1_01_B2_2	2016-06-07									F	003	F003	2	10	0.2	0.177502
1_01_B2_2	2016-06-07									F	004	F004	0	8	0	-0.746019
1_01_B2_2	2016-06-07									F	005	F005	0	2	0	-0.746019
1_01_B2_2	2016-06-07									F	006	F006	0	4	0	-0.746019
1_01_B2_2	2016-06-07									F	007	F007	1	7	0.142857	-0.086361
1_01_B2_2	2016-06-07									F	008	F008	1	7	0.142857	-0.086361
1_01_B2_2	2016-06-07									F	009	F009	0	7	0	-0.746019
1_01_B2_2	2016-06-07									F	010	F010	1	6	0.166667	0.023582
1_01_B2_2	2016-06-07									F	011	F011	1	5	0.2	0.177502
1_01_B2_2	2016-06-07									F	012	F012	1	3	0.333333	0.793183
1_01_B2_2	2016-06-07									G	001	G001	3	9	0.333333	0.793183
1_01_B2_2	2016-06-07									G	002	G002	1	3	0.333333	0.793183
1_01_B2_2	2016-06-07									G	003	G003	1	4	0.25	0.408383
1_01_B2_2	2016-06-07									G	004	G004	0	3	0	-0.746019
1_01_B2_2	2016-06-07									G	005	G005	0	2	0	-0.746019
1_01_B2_2	2016-06-07									G	006	G006	3	6	0.5	1.56279
1_01_B2_2	2016-06-07									G	007	G007	0	1	0	-0.746019
1_01_B2_2	2016-06-07									G	008	G008	0	5	0	-0.746019
1_01_B2_2	2016-06-07									G	009	G009	2	5	0.4	1.10102
1_01_B2_2	2016-06-07						mpk-1		pos	G	010	G010	1	9	0.111111	-0.232952
1_01_B2_2	2016-06-07							mek-2	pos	G	011	G011	1	10	0.1	-0.284259
1_01_B2_2	2016-06-07									G	012	G012	1	5	0.2	0.177502
1_01_B2_2	2016-06-07									H	001	H001	0	4	0	-0.746019
1_01_B2_2	2016-06-07									H	002	H002	1	6	0.166667	0.023582
1_01_B2_2	2016-06-07									H	003	H003	2	4	0.5	1.56279
1_01_B2_2	2016-06-07									H	004	H004	1	7	0.142857	-0.086361
1_01_B2_2	2016-06-07									H	005	H005	0	0	NaN	NaN
1_01_B2_2	2016-06-07									H	006	H006	1	3	0.333333	0.793183
1_01_B2_2	2016-06-07									H	007	H007	1	6	0.166667	0.023582
1_01_B2_2	2016-06-07									H	008	H008	1	6	0.166667	0.023582
1_01_B2_2	2016-06-07									H	009	H009	3	8	0.375	0.985584
1_01_B2_2	2016-06-07									H	010	H010	0	3	0	-0.746019
1_01_B2_2	2016-06-07									H	011	H011	0	4	0	-0.746019
1_01_B2_2	2016-06-07									H	012	H012	0	5	0	-0.746019
1_02_A1_1	2015-07-31									A	001	A001	0	9	0	-0.467792
1_02_A1_1	2015-07-31									A	002	A002	1	18	0.055556	-0.20332
1_02_A1_1	2015-07-31					cye-1			pos	A	003	A003	4	4	1	4.2927
1_02_A1_1	2015-07-31									A	004	A004	0	3	0	-0.467792
1_02_A1_1	2015-07-31									A	005	A005	0	15	0	-0.467792
1_02_A1_1	2015-07-31									A	006	A006	0	11	0	-0.467792
1_02_A1_1	2015-07-31									A	007	A007	0	13	0	-0.467792
1_02_A1_1	2015-07-31									A	008	A008	0	15	0	-0.467792
1_02_A1_1	2015-07-31									A	009	A009	3	15	0.2	0.484307
1_02_A1_1	2015-07-31									A	010	A010	0	2	0	-0.467792
1_02_A1_1	2015-07-31									A	011	A011	1	14	0.071429	-0.127757
1_02_A1_1	2015-07-31									A	012	A012	1	16	0.0625	-0.170261
1_02_A1_1	2015-07-31									B	001	B001	0	6	0	-0.467792
1_02_A1_1	2015-07-31									B	002	B002	0	10	0	-0.467792
1_02_A1_1	2015-07-31									B	003	B003	0	10	0	-0.467792
1_02_A1_1	2015-07-31									B	004	B004	2	14	0.142857	0.212279
1_02_A1_1	2015-07-31									B	005	B005	0	11	0	-0.467792
1_02_A1_1	2015-07-31									B	006	B006	1	10	0.1	0.008257
1_02_A1_1	2015-07-31									B	007	B007	0	0	NaN	NaN
1_02_A1_1	2015-07-31									B	008	B008	0	13	0	-0.467792
1_02_A1_1	2015-07-31									B	009	B009	0	13	0	-0.467792
1_02_A1_1	2015-07-31									B	010	B010	1	13	0.076923	-0.1016
1_02_A1_1	2015-07-31									B	011	B011	0	7	0	-0.467792
1_02_A1_1	2015-07-31									B	012	B012	0	9	0	-0.467792
1_02_A1_1	2015-07-31									C	001	C001	0	5	0	-0.467792
1_02_A1_1	2015-07-31									C	002	C002	1	5	0.2	0.484307
1_02_A1_1	2015-07-31									C	003	C003	0	7	0	-0.467792
1_02_A1_1	2015-07-31									C	004	C004	0	15	0	-0.467792
1_02_A1_1	2015-07-31									C	005	C005	2	16	0.125	0.12727
1_02_A1_1	2015-07-31									C	006	C006	0	13	0	-0.467792
1_02_A1_1	2015-07-31									C	007	C007	0	0	NaN	NaN
1_02_A1_1	2015-07-31									C	008	C008	0	8	0	-0.467792
1_02_A1_1	2015-07-31									C	009	C009	2	7	0.285714	0.892349
1_02_A1_1	2015-07-31									C	010	C010	0	13	0	-0.467792
1_02_A1_1	2015-07-31				dpy				neg	C	011	C011	0	6	0	-0.467792
1_02_A1_1	2015-07-31	L4440							neg	C	012	C012	0	16	0	-0.467792
1_02_A1_1	2015-07-31									D	001	D001	2	14	0.142857	0.212279
1_02_A1_1	2015-07-31									D	002	D002	0	14	0	-0.467792
1_02_A1_1	2015-07-31									D	003	D003	1	15	0.066667	-0.150426
1_02_A1_1	2015-07-31									D	004	D004	1	10	0.1	0.008257
1_02_A1_1	2015-07-31									D	005	D005	0	20	0	-0.467792
1_02_A1_1	2015-07-31									D	006	D006	0	11	0	-0.467792
1_02_A1_1	2015-07-31									D	007	D007	0	8	0	-0.467792
1_02_A1_1	2015-07-31									D	008	D008	1	8	0.125	0.12727
1_02_A1_1	2015-07-31									D	009	D009	2	14	0.142857	0.212279
1_02_A1_1	2015-07-31									D	010	D010	1	13	0.076923	-0.1016
1_02_A1_1	2015-07-31		GFP						pos	D	011	D011	18	18	1	4.2927
1_02_A1_1	2015-07-31									D	012	D012	1	16	0.0625	-0.170261
1_02_A1_1	2015-07-31									E	001	E001	1	9	0.111111	0.061152
1_02_A1_1	2015-07-31									E	002	E002	1	16	0.0625	-0.170261
1_02_A1_1	2015-07-31									E	003	E003	2	9	0.222222	0.590095
1_02_A1_1	2015-07-31									E	004	E004	1	13	0.076923	-0.1016
1_02_A1_1	2015-07-31									E	005	E005	0	9	0	-0.467792
1_02_A1_1	2015-07-31									E	006	E006	0	7	0	-0.467792
1_02_A1_1	2015-07-31									E	007	E007	3	9	0.333333	1.11904
1_02_A1_1	2015-07-31									E	008	E008	0	11	0	-0.467792
1_02_A1_1	2015-07-31									E	009	E009	2	18	0.111111	0.061152
1_02_A1_1	2015-07-31									E	010	E010	3	19	0.157895	0.283865
1_02_A1_1	2015-07-31									E	011	E011	0	23	0	-0.467792
1_02_A1_1	2015-07-31									E	012	E012	0	18	0	-0.467792
1_02_A1_1	2015-07-31			lag-1					pos	F	001	F001	1	12	0.083333	-0.071084
1_02_A1_1	2015-07-31									F	002	F002	0	10	0	-0.467792
1_02_A1_1	2015-07-31									F	003	F003	1	16	0.0625	-0.170261
1_02_A1_1	2015-07-31							mek-2	pos	F	004	F004	20	20	1	4.2927
1_02_A1_1	2015-07-31						mpk-1		pos	F	005	F005	12	12	1	4.2927
1_02_A1_1	2015-07-31									F	006	F006	0	7	0	-0.467792
1_02_A1_1	2015-07-31									F	007	F007	0	4	0	-0.467792
1_02_A1_1	2015-07-31									F	008	F008	2	19	0.105263	0.033313
1_02_A1_1	2015-07-31									F	009	F009	0	7	0	-0.467792
1_02_A1_1	2015-07-31									F	010	F010	1	16	0.0625	-0.170261
1_02_A1_1	2015-07-31									F	011	F011	1	17	0.058824	-0.187763
1_02_A1_1	2015-07-31									F	012	F012	1	20	0.05	-0.229767
1_02_A1_1	2015-07-31									G	001	G001	1	11	0.090909	-0.03502
1_02_A1_1	2015-07-31									G	002	G002	0	9	0	-0.467792
1_02_A1_1	2015-07-31									G	003	G003	2	6	0.333333	1.11904
1_02_A1_1	2015-07-31									G	004	G004	0	14	0	-0.467792
1_02_A1_1	2015-07-31									G	005	G005	1	16	0.0625	-0.170261
1_02_A1_1	2015-07-31									G	006	G006	1	2	0.5	1.91246
1_02_A1_1	2015-07-31									G	007	G007	0	4	0	-0.467792
1_02_A1_1	2015-07-31									G	008	G008	0	9	0	-0.467792
1_02_A1_1	2015-07-31									G	009	G009	0	12	0	-0.467792
1_02_A1_1	2015-07-31									G	010	G010	0	7	0	-0.467792
1_02_A1_1	2015-07-31									G	011	G011	1	12	0.083333	-0.071084
1_02_A1_1	2015-07-31									G	012	G012	0	19	0	-0.467792
1_02_A1_1	2015-07-31									H	001	H001	0	8	0	-0.467792
1_02_A1_1	2015-07-31									H	002	H002	1	11	0.090909	-0.03502
1_02_A1_1	2015-07-31									H	003	H003	1	12	0.083333	-0.071084
1_02_A1_1	2015-07-31									H	004	H004	0	9	0	-0.467792
1_02_A1_1	2015-07-31									H	005	H005	1	15	0.066667	-0.150426
1_02_A1_1	2015-07-31									H	006	H006	0	7	0	-0.467792
1_02_A1_1	2015-07-31									H	007	H007	0	7	0	-0.467792
1_02_A1_1	2015-07-31									H	008	H008	1	6	0.166667	0.325624
1_02_A1_1	2015-07-31									H	009	H009	1	8	0.125	0.12727
1_02_A1_1	2015-07-31									H	010	H010	0	12	0	-0.467792
1_02_A1_1	2015-07-31									H	011	H011	0	4	0	-0.467792
1_02_A1_1	2015-07-31									H	012	H012	1	10	0.1	0.008257
1_02_A1_2	2015-07-31									A	001	A001	1	20	0.05	-0.196512
1_02_A1_2	2015-07-31									A	002	A002	0	10	0	-0.424312
1_02_A1_2	2015-07-31					cye-1			pos	A	003	A003	20	20	1	4.13169
1_02_A1_2	2015-07-31									A	004	A004	1	22	0.045455	-0.217221
1_02_A1_2	2015-07-31									A	005	A005	1	19	0.052632	-0.184522
1_02_A1_2	2015-07-31									A	006	A006	1	17	0.058824	-0.156311
1_02_A1_2	2015-07-31									A	007	A007	1	12	0.083333	-0.044645
1_02_A1_2	2015-07-31									A	008	A008	1	22	0.045455	-0.217221
1_02_A1_2	2015-07-31									A	009	A009	1	11	0.090909	-0.010129
1_02_A1_2	2015-07-31									A	010	A010	4	4	1	4.13169
1_02_A1_2	2015-07-31									A	011	A011	0	14	0	-0.424312
1_02_A1_2	2015-07-31									A	012	A012	0	10	0	-0.424312
1_02_A1_2	2015-07-31									B	001	B001	1	14	0.071429	-0.098883
1_02_A1_2	2015-07-31									B	002	B002	0	13	0	-0.424312
1_02_A1_2	2015-07-31									B	003	B003	0	16	0	-0.424312
1_02_A1_2	2015-07-31									B	004	B004	1	10	0.1	0.031289
1_02_A1_2	2015-07-31									B	005	B005	0	21	0	-0.424312
1_02_A1_2	2015-07-31									B	006	B006	2	25	0.08	-0.059831
1_02_A1_2	2015-07-31									B	007	B007	0	0	NaN	NaN
1_02_A1_2	2015-07-31									B	008	B008	1	12	0.083333	-0.044645
1_02_A1_2	2015-07-31									B	009	B009	0	12	0	-0.424312
1_02_A1_2	2015-07-31									B	010	B010	2	11	0.181818	0.404053
1_02_A1_2	2015-07-31									B	011	B011	0	7	0	-0.424312
1_02_A1_2	2015-07-31									B	012	B012	1	12	0.083333	-0.044645
1_02_A1_2	2015-07-31									C	001	C001	2	12	0.166667	0.335023
1_02_A1_2	2015-07-31									C	002	C002	0	10	0	-0.424312
1_02_A1_2	2015-07-31									C	003	C003	1	10	0.1	0.031289
1_02_A1_2	2015-07-31									C	004	C004	0	23	0	-0.424312
1_02_A1_2	2015-07-31									C	005	C005	1	25	0.04	-0.242072
1_02_A1_2	2015-07-31									C	006	C006	0	17	0	-0.424312
1_02_A1_2	2015-07-31									C	007	C007	0	14	0	-0.424312
1_02_A1_2	2015-07-31									C	008	C008	0	12	0	-0.424312
1_02_A1_2	2015-07-31									C	009	C009	3	11	0.272727	0.818235
1_02_A1_2	2015-07-31									C	010	C010	0	8	0	-0.424312
1_02_A1_2	2015-07-31				dpy				neg	C	011	C011	0	13	0	-0.424312
1_02_A1_2	2015-07-31	L4440							neg	C	012	C012	1	13	0.076923	-0.07385
1_02_A1_2	2015-07-31									D	001	D001	0	12	0	-0.424312
1_02_A1_2	2015-07-31									D	002	D002	0	21	0	-0.424312
1_02_A1_2	2015-07-31									D	003	D003	0	16	0	-0.424312
1_02_A1_2	2015-07-31									D	004	D004	0	23	0	-0.424312
1_02_A1_2	2015-07-31									D	005	D005	0	16	0	-0.424312
1_02_A1_2	2015-07-31									D	006	D006	3	16	0.1875	0.429939
1_02_A1_2	2015-07-31									D	007	D007	0	10	0	-0.424312
1_02_A1_2	2015-07-31									D	008	D008	0	15	0	-0.424312
1_02_A1_2	2015-07-31									D	009	D009	0	10	0	-0.424312
1_02_A1_2	2015-07-31									D	010	D010	0	14	0	-0.424312
1_02_A1_2	2015-07-31		GFP						pos	D	011	D011	15	15	1	4.13169
1_02_A1_2	2015-07-31									D	012	D012	0	24	0	-0.424312
1_02_A1_2	2015-07-31									E	001	E001	1	26	0.038462	-0.249081
1_02_A1_2	2015-07-31									E	002	E002	0	10	0	-0.424312
1_02_A1_2	2015-07-31									E	003	E003	1	17	0.058824	-0.156311
1_02_A1_2	2015-07-31									E	004	E004	1	14	0.071429	-0.098883
1_02_A1_2	2015-07-31									E	005	E005	1	14	0.071429	-0.098883
1_02_A1_2	2015-07-31									E	006	E006	0	11	0	-0.424312
1_02_A1_2	2015-07-31									E	007	E007	1	15	0.066667	-0.120578
1_02_A1_2	2015-07-31									E	008	E008	0	16	0	-0.424312
1_02_A1_2	2015-07-31									E	009	E009	0	12	0	-0.424312
1_02_A1_2	2015-07-31									E	010	E010	1	10	0.1	0.031289
1_02_A1_2	2015-07-31									E	011	E011	1	12	0.083333	-0.044645
1_02_A1_2	2015-07-31									E	012	E012	4	20	0.2	0.486889
1_02_A1_2	2015-07-31			lag-1					pos	F	001	F001	0	12	0	-0.424312
1_02_A1_2	2015-07-31									F	002	F002	2	18	0.111111	0.081911
1_02_A1_2	2015-07-31									F	003	F003	0	8	0	-0.424312
1_02_A1_2	2015-07-31							mek-2	pos	F	004	F004	8	8	1	4.13169
1_02_A1_2	2015-07-31						mpk-1		pos	F	005	F005	12	13	0.923077	3.78123
1_02_A1_2	2015-07-31									F	006	F006	0	9	0	-0.424312
1_02_A1_2	2015-07-31									F	007	F007	2	12	0.166667	0.335023
1_02_A1_2	2015-07-31									F	008	F008	0	7	0	-0.424312
1_02_A1_2	2015-07-31									F	009	F009	0	6	0	-0.424312
1_02_A1_2	2015-07-31									F	010	F010	1	10	0.1	0.031289
1_02_A1_2	2015-07-31									F	011	F011	1	7	0.142857	0.226546
1_02_A1_2	2015-07-31									F	012	F012	0	10	0	-0.424312
1_02_A1_2	2015-07-31									G	001	G001	1	12	0.083333	-0.044645
1_02_A1_2	2015-07-31									G	002	G002	0	9	0	-0.424312
1_02_A1_2	2015-07-31									G	003	G003	0	17	0	-0.424312
1_02_A1_2	2015-07-31									G	004	G004	2	14	0.142857	0.226546
1_02_A1_2	2015-07-31									G	005	G005	0	8	0	-0.424312
1_02_A1_2	2015-07-31									G	006	G006	1	8	0.125	0.145189
1_02_A1_2	2015-07-31									G	007	G007	0	7	0	-0.424312
1_02_A1_2	2015-07-31									G	008	G008	0	7	0	-0.424312
1_02_A1_2	2015-07-31									G	009	G009	0	7	0	-0.424312
1_02_A1_2	2015-07-31									G	010	G010	0	5	0	-0.424312
1_02_A1_2	2015-07-31									G	011	G011	0	13	0	-0.424312
1_02_A1_2	2015-07-31									G	012	G012	0	18	0	-0.424312
1_02_A1_2	2015-07-31									H	001	H001	0	15	0	-0.424312
1_02_A1_2	2015-07-31									H	002	H002	1	14	0.071429	-0.098883
1_02_A1_2	2015-07-31									H	003	H003	3	17	0.176471	0.379689
1_02_A1_2	2015-07-31									H	004	H004	0	18	0	-0.424312
1_02_A1_2	2015-07-31									H	005	H005	0	8	0	-0.424312
1_02_A1_2	2015-07-31									H	006	H006	0	14	0	-0.424312
1_02_A1_2	2015-07-31									H	007	H007	0	10	0	-0.424312
1_02_A1_2	2015-07-31									H	008	H008	0	8	0	-0.424312
1_02_A1_2	2015-07-31									H	009	H009	1	15	0.066667	-0.120578
1_02_A1_2	2015-07-31									H	010	H010	0	11	0	-0.424312
1_02_A1_2	2015-07-31									H	011	H011	2	16	0.125	0.145189
1_02_A1_2	2015-07-31									H	012	H012	1	19	0.052632	-0.184522
1_02_A2_1	2015-07-31									A	001	A001	1	13	0.076923	-0.373849
1_02_A2_1	2015-07-31									A	002	A002	0	11	0	-0.657253
1_02_A2_1	2015-07-31									A	003	A003	0	17	0	-0.657253
1_02_A2_1	2015-07-31									A	004	A004	2	12	0.166667	-0.04321
1_02_A2_1	2015-07-31									A	005	A005	0	15	0	-0.657253
1_02_A2_1	2015-07-31									A	006	A006	1	23	0.043478	-0.497068
1_02_A2_1	2015-07-31									A	007	A007	0	13	0	-0.657253
1_02_A2_1	2015-07-31									A	008	A008	0	22	0	-0.657253
1_02_A2_1	2015-07-31									A	009	A009	0	12	0	-0.657253
1_02_A2_1	2015-07-31									A	010	A010	1	7	0.142857	-0.130931
1_02_A2_1	2015-07-31									A	011	A011	1	11	0.090909	-0.322321
1_02_A2_1	2015-07-31									A	012	A012	0	9	0	-0.657253
1_02_A2_1	2015-07-31									B	001	B001	0	7	0	-0.657253
1_02_A2_1	2015-07-31									B	002	B002	1	15	0.066667	-0.411636
1_02_A2_1	2015-07-31									B	003	B003	2	22	0.090909	-0.322321
1_02_A2_1	2015-07-31									B	004	B004	2	20	0.1	-0.288827
1_02_A2_1	2015-07-31									B	005	B005	2	20	0.1	-0.288827
1_02_A2_1	2015-07-31									B	006	B006	0	18	0	-0.657253
1_02_A2_1	2015-07-31									B	007	B007	3	16	0.1875	0.033545
1_02_A2_1	2015-07-31									B	008	B008	0	20	0	-0.657253
1_02_A2_1	2015-07-31									B	009	B009	15	15	1	3.027
1_02_A2_1	2015-07-31									B	010	B010	1	8	0.125	-0.196721
1_02_A2_1	2015-07-31									B	011	B011	1	14	0.071429	-0.394092
1_02_A2_1	2015-07-31									B	012	B012	0	11	0	-0.657253
1_02_A2_1	2015-07-31									C	001	C001	1	18	0.055556	-0.452572
1_02_A2_1	2015-07-31									C	002	C002	2	12	0.166667	-0.04321
1_02_A2_1	2015-07-31									C	003	C003	3	6	0.5	1.18488
1_02_A2_1	2015-07-31					cye-1			pos	C	004	C004	14	14	1	3.027
1_02_A2_1	2015-07-31									C	005	C005	2	19	0.105263	-0.269437
1_02_A2_1	2015-07-31									C	006	C006	15	17	0.882353	2.59356
1_02_A2_1	2015-07-31									C	007	C007	1	9	0.111111	-0.247891
1_02_A2_1	2015-07-31									C	008	C008	2	12	0.166667	-0.04321
1_02_A2_1	2015-07-31									C	009	C009	1	4	0.25	0.263811
1_02_A2_1	2015-07-31									C	010	C010	0	10	0	-0.657253
1_02_A2_1	2015-07-31									C	011	C011	2	7	0.285714	0.395392
1_02_A2_1	2015-07-31									C	012	C012	2	10	0.2	0.079598
1_02_A2_1	2015-07-31									D	001	D001	1	11	0.090909	-0.322321
1_02_A2_1	2015-07-31									D	002	D002	1	19	0.052632	-0.463345
1_02_A2_1	2015-07-31									D	003	D003	1	11	0.090909	-0.322321
1_02_A2_1	2015-07-31									D	004	D004	17	17	1	3.027
1_02_A2_1	2015-07-31									D	005	D005	3	14	0.214286	0.132231
1_02_A2_1	2015-07-31									D	006	D006	2	9	0.222222	0.161471
1_02_A2_1	2015-07-31									D	007	D007	2	13	0.153846	-0.090444
1_02_A2_1	2015-07-31			lag-1					pos	D	008	D008	8	10	0.8	2.29015
1_02_A2_1	2015-07-31		GFP						pos	D	009	D009	9	9	1	3.027
1_02_A2_1	2015-07-31				dpy				neg	D	010	D010	1	9	0.111111	-0.247891
1_02_A2_1	2015-07-31									D	011	D011	1	16	0.0625	-0.426987
1_02_A2_1	2015-07-31	L4440							neg	D	012	D012	1	20	0.05	-0.47304
1_02_A2_1	2015-07-31									E	001	E001	0	10	0	-0.657253
1_02_A2_1	2015-07-31									E	002	E002	0	0	NaN	NaN
1_02_A2_1	2015-07-31									E	003	E003	0	13	0	-0.657253
1_02_A2_1	2015-07-31									E	004	E004	3	21	0.142857	-0.130931
1_02_A2_1	2015-07-31									E	005	E005	0	10	0	-0.657253
1_02_A2_1	2015-07-31									E	006	E006	0	6	0	-0.657253
1_02_A2_1	2015-07-31									E	007	E007	2	12	0.166667	-0.04321
1_02_A2_1	2015-07-31									E	008	E008	2	17	0.117647	-0.223811
1_02_A2_1	2015-07-31									E	009	E009	1	12	0.083333	-0.350232
1_02_A2_1	2015-07-31									E	010	E010	0	8	0	-0.657253
1_02_A2_1	2015-07-31									E	011	E011	1	12	0.083333	-0.350232
1_02_A2_1	2015-07-31									E	012	E012	2	15	0.133333	-0.166019
1_02_A2_1	2015-07-31									F	001	F001	3	9	0.333333	0.570833
1_02_A2_1	2015-07-31									F	002	F002	6	14	0.428571	0.921714
1_02_A2_1	2015-07-31									F	003	F003	1	5	0.2	0.079598
1_02_A2_1	2015-07-31									F	004	F004	2	11	0.181818	0.012612
1_02_A2_1	2015-07-31									F	005	F005	0	5	0	-0.657253
1_02_A2_1	2015-07-31									F	006	F006	2	6	0.333333	0.570833
1_02_A2_1	2015-07-31									F	007	F007	0	4	0	-0.657253
1_02_A2_1	2015-07-31									F	008	F008	0	9	0	-0.657253
1_02_A2_1	2015-07-31									F	009	F009	0	4	0	-0.657253
1_02_A2_1	2015-07-31									F	010	F010	1	10	0.1	-0.288827
1_02_A2_1	2015-07-31									F	011	F011	0	10	0	-0.657253
1_02_A2_1	2015-07-31									F	012	F012	1	13	0.076923	-0.373849
1_02_A2_1	2015-07-31									G	001	G001	3	6	0.5	1.18488
1_02_A2_1	2015-07-31									G	002	G002	7	8	0.875	2.56647
1_02_A2_1	2015-07-31									G	003	G003	2	10	0.2	0.079598
1_02_A2_1	2015-07-31									G	004	G004	0	13	0	-0.657253
1_02_A2_1	2015-07-31									G	005	G005	0	3	0	-0.657253
1_02_A2_1	2015-07-31									G	006	G006	0	2	0	-0.657253
1_02_A2_1	2015-07-31									G	007	G007	0	2	0	-0.657253
1_02_A2_1	2015-07-31									G	008	G008	0	9	0	-0.657253
1_02_A2_1	2015-07-31									G	009	G009	0	7	0	-0.657253
1_02_A2_1	2015-07-31									G	010	G010	0	8	0	-0.657253
1_02_A2_1	2015-07-31									G	011	G011	0	10	0	-0.657253
1_02_A2_1	2015-07-31									G	012	G012	0	12	0	-0.657253
1_02_A2_1	2015-07-31									H	001	H001	0	11	0	-0.657253
1_02_A2_1	2015-07-31									H	002	H002	2	8	0.25	0.263811
1_02_A2_1	2015-07-31									H	003	H003	0	10	0	-0.657253
1_02_A2_1	2015-07-31							mek-2	pos	H	004	H004	9	11	0.818182	2.35714
1_02_A2_1	2015-07-31									H	005	H005	2	7	0.285714	0.395392
1_02_A2_1	2015-07-31									H	006	H006	1	8	0.125	-0.196721
1_02_A2_1	2015-07-31									H	007	H007	0	3	0	-0.657253
1_02_A2_1	2015-07-31									H	008	H008	0	0	NaN	NaN
1_02_A2_1	2015-07-31						mpk-1		pos	H	009	H009	4	4	1	3.027
1_02_A2_1	2015-07-31									H	010	H010	1	4	0.25	0.263811
1_02_A2_1	2015-07-31									H	011	H011	2	8	0.25	0.263811
1_02_A2_1	2015-07-31									H	012	H012	0	9	0	-0.657253
1_02_A2_2	2015-07-31									A	001	A001	0	10	0	-0.605741
1_02_A2_2	2015-07-31									A	002	A002	1	6	0.166667	0.06003
1_02_A2_2	2015-07-31									A	003	A003	1	8	0.125	-0.106413
1_02_A2_2	2015-07-31									A	004	A004	0	5	0	-0.605741
1_02_A2_2	2015-07-31									A	005	A005	0	14	0	-0.605741
1_02_A2_2	2015-07-31									A	006	A006	2	11	0.181818	0.120555
1_02_A2_2	2015-07-31									A	007	A007	2	15	0.133333	-0.073124
1_02_A2_2	2015-07-31									A	008	A008	2	15	0.133333	-0.073124
1_02_A2_2	2015-07-31									A	009	A009	1	22	0.045455	-0.424167
1_02_A2_2	2015-07-31									A	010	A010	2	15	0.133333	-0.073124
1_02_A2_2	2015-07-31									A	011	A011	1	12	0.083333	-0.272856
1_02_A2_2	2015-07-31									A	012	A012	0	6	0	-0.605741
1_02_A2_2	2015-07-31									B	001	B001	0	6	0	-0.605741
1_02_A2_2	2015-07-31									B	002	B002	0	5	0	-0.605741
1_02_A2_2	2015-07-31									B	003	B003	0	14	0	-0.605741
1_02_A2_2	2015-07-31									B	004	B004	2	18	0.111111	-0.161894
1_02_A2_2	2015-07-31									B	005	B005	0	17	0	-0.605741
1_02_A2_2	2015-07-31									B	006	B006	1	12	0.083333	-0.272856
1_02_A2_2	2015-07-31									B	007	B007	2	13	0.153846	0.008817
1_02_A2_2	2015-07-31									B	008	B008	0	12	0	-0.605741
1_02_A2_2	2015-07-31									B	009	B009	10	11	0.909091	3.02574
1_02_A2_2	2015-07-31									B	010	B010	1	8	0.125	-0.106413
1_02_A2_2	2015-07-31									B	011	B011	0	7	0	-0.605741
1_02_A2_2	2015-07-31									B	012	B012	0	10	0	-0.605741
1_02_A2_2	2015-07-31									C	001	C001	0	9	0	-0.605741
1_02_A2_2	2015-07-31									C	002	C002	0	10	0	-0.605741
1_02_A2_2	2015-07-31									C	003	C003	5	15	0.333333	0.725802
1_02_A2_2	2015-07-31					cye-1			pos	C	004	C004	0	12	0	-0.605741
1_02_A2_2	2015-07-31									C	005	C005	0	21	0	-0.605741
1_02_A2_2	2015-07-31									C	006	C006	12	12	1	3.38889
1_02_A2_2	2015-07-31									C	007	C007	0	13	0	-0.605741
1_02_A2_2	2015-07-31									C	008	C008	1	18	0.055556	-0.383817
1_02_A2_2	2015-07-31									C	009	C009	2	14	0.142857	-0.03508
1_02_A2_2	2015-07-31									C	010	C010	2	17	0.117647	-0.135785
1_02_A2_2	2015-07-31									C	011	C011	1	12	0.083333	-0.272856
1_02_A2_2	2015-07-31									C	012	C012	2	15	0.133333	-0.073124
1_02_A2_2	2015-07-31									D	001	D001	1	16	0.0625	-0.356077
1_02_A2_2	2015-07-31									D	002	D002	2	20	0.1	-0.206278
1_02_A2_2	2015-07-31									D	003	D003	3	15	0.2	0.193185
1_02_A2_2	2015-07-31									D	004	D004	16	17	0.941176	3.15391
1_02_A2_2	2015-07-31									D	005	D005	4	20	0.2	0.193185
1_02_A2_2	2015-07-31									D	006	D006	0	11	0	-0.605741
1_02_A2_2	2015-07-31									D	007	D007	1	11	0.090909	-0.242593
1_02_A2_2	2015-07-31			lag-1					pos	D	008	D008	15	17	0.882353	2.91893
1_02_A2_2	2015-07-31		GFP						pos	D	009	D009	11	11	1	3.38889
1_02_A2_2	2015-07-31				dpy				neg	D	010	D010	2	11	0.181818	0.120555
1_02_A2_2	2015-07-31									D	011	D011	0	17	0	-0.605741
1_02_A2_2	2015-07-31	L4440							neg	D	012	D012	0	10	0	-0.605741
1_02_A2_2	2015-07-31									E	001	E001	0	11	0	-0.605741
1_02_A2_2	2015-07-31									E	002	E002	0	0	NaN	NaN
1_02_A2_2	2015-07-31									E	003	E003	1	15	0.066667	-0.339433
1_02_A2_2	2015-07-31									E	004	E004	2	18	0.111111	-0.161894
1_02_A2_2	2015-07-31									E	005	E005	0	13	0	-0.605741
1_02_A2_2	2015-07-31									E	006	E006	2	16	0.125	-0.106413
1_02_A2_2	2015-07-31									E	007	E007	0	12	0	-0.605741
1_02_A2_2	2015-07-31									E	008	E008	0	13	0	-0.605741
1_02_A2_2	2015-07-31									E	009	E009	5	12	0.416667	1.05869
1_02_A2_2	2015-07-31									E	010	E010	1	8	0.125	-0.106413
1_02_A2_2	2015-07-31									E	011	E011	0	10	0	-0.605741
1_02_A2_2	2015-07-31									E	012	E012	0	10	0	-0.605741
1_02_A2_2	2015-07-31									F	001	F001	1	15	0.066667	-0.339433
1_02_A2_2	2015-07-31									F	002	F002	2	15	0.133333	-0.073124
1_02_A2_2	2015-07-31									F	003	F003	0	7	0	-0.605741
1_02_A2_2	2015-07-31									F	004	F004	2	15	0.133333	-0.073124
1_02_A2_2	2015-07-31									F	005	F005	1	9	0.111111	-0.161894
1_02_A2_2	2015-07-31									F	006	F006	1	9	0.111111	-0.161894
1_02_A2_2	2015-07-31									F	007	F007	0	5	0	-0.605741
1_02_A2_2	2015-07-31									F	008	F008	2	14	0.142857	-0.03508
1_02_A2_2	2015-07-31									F	009	F009	3	11	0.272727	0.483703
1_02_A2_2	2015-07-31									F	010	F010	0	17	0	-0.605741
1_02_A2_2	2015-07-31									F	011	F011	2	10	0.2	0.193185
1_02_A2_2	2015-07-31									F	012	F012	1	22	0.045455	-0.424167
1_02_A2_2	2015-07-31									G	001	G001	5	8	0.625	1.8909
1_02_A2_2	2015-07-31									G	002	G002	3	9	0.333333	0.725802
1_02_A2_2	2015-07-31									G	003	G003	0	11	0	-0.605741
1_02_A2_2	2015-07-31									G	004	G004	0	11	0	-0.605741
1_02_A2_2	2015-07-31									G	005	G005	2	14	0.142857	-0.03508
1_02_A2_2	2015-07-31									G	006	G006	2	7	0.285714	0.535582
1_02_A2_2	2015-07-31									G	007	G007	0	7	0	-0.605741
1_02_A2_2	2015-07-31									G	008	G008	1	7	0.142857	-0.03508
1_02_A2_2	2015-07-31									G	009	G009	0	18	0	-0.605741
1_02_A2_2	2015-07-31									G	010	G010	1	13	0.076923	-0.298462
1_02_A2_2	2015-07-31									G	011	G011	1	18	0.055556	-0.383817
1_02_A2_2	2015-07-31									G	012	G012	2	22	0.090909	-0.242593
1_02_A2_2	2015-07-31									H	001	H001	1	9	0.111111	-0.161894
1_02_A2_2	2015-07-31									H	002	H002	2	16	0.125	-0.106413
1_02_A2_2	2015-07-31									H	003	H003	2	25	0.08	-0.286171
1_02_A2_2	2015-07-31							mek-2	pos	H	004	H004	12	12	1	3.38889
1_02_A2_2	2015-07-31									H	005	H005	1	7	0.142857	-0.03508
1_02_A2_2	2015-07-31									H	006	H006	0	11	0	-0.605741
1_02_A2_2	2015-07-31									H	007	H007	0	4	0	-0.605741
1_02_A2_2	2015-07-31									H	008	H008	0	0	NaN	NaN
1_02_A2_2	2015-07-31						mpk-1		pos	H	009	H009	13	14	0.928571	3.10356
1_02_A2_2	2015-07-31									H	010	H010	0	16	0	-0.605741
1_02_A2_2	2015-07-31									H	011	H011	2	21	0.095238	-0.2253
1_02_A2_2	2015-07-31									H	012	H012	1	21	0.047619	-0.415521
1_02_B1_1	2015-08-14									A	001	A001	0	8	0	-0.810918
1_02_B1_1	2015-08-14									A	002	A002	2	10	0.2	0.413824
1_02_B1_1	2015-08-14									A	003	A003	1	15	0.066667	-0.402671
1_02_B1_1	2015-08-14									A	004	A004	2	12	0.166667	0.209701
1_02_B1_1	2015-08-14									A	005	A005	2	15	0.133333	0.005577
1_02_B1_1	2015-08-14									A	006	A006	0	9	0	-0.810918
1_02_B1_1	2015-08-14									A	007	A007	0	8	0	-0.810918
1_02_B1_1	2015-08-14									A	008	A008	1	11	0.090909	-0.254217
1_02_B1_1	2015-08-14									A	009	A009	1	13	0.076923	-0.339863
1_02_B1_1	2015-08-14									A	010	A010	1	14	0.071429	-0.37351
1_02_B1_1	2015-08-14									A	011	A011	1	9	0.111111	-0.130506
1_02_B1_1	2015-08-14									A	012	A012	1	16	0.0625	-0.428186
1_02_B1_1	2015-08-14									B	001	B001	0	13	0	-0.810918
1_02_B1_1	2015-08-14									B	002	B002	1	13	0.076923	-0.339863
1_02_B1_1	2015-08-14									B	003	B003	1	15	0.066667	-0.402671
1_02_B1_1	2015-08-14									B	004	B004	4	14	0.285714	0.938714
1_02_B1_1	2015-08-14									B	005	B005	0	14	0	-0.810918
1_02_B1_1	2015-08-14									B	006	B006	1	11	0.090909	-0.254217
1_02_B1_1	2015-08-14									B	007	B007	0	4	0	-0.810918
1_02_B1_1	2015-08-14									B	008	B008	1	10	0.1	-0.198547
1_02_B1_1	2015-08-14									B	009	B009	4	12	0.333333	1.23032
1_02_B1_1	2015-08-14									B	010	B010	0	10	0	-0.810918
1_02_B1_1	2015-08-14									B	011	B011	3	17	0.176471	0.269737
1_02_B1_1	2015-08-14									B	012	B012	1	13	0.076923	-0.339863
1_02_B1_1	2015-08-14									C	001	C001	1	6	0.166667	0.209701
1_02_B1_1	2015-08-14									C	002	C002	2	7	0.285714	0.938714
1_02_B1_1	2015-08-14									C	003	C003	3	10	0.3	1.0262
1_02_B1_1	2015-08-14									C	004	C004	2	10	0.2	0.413824
1_02_B1_1	2015-08-14									C	005	C005	2	11	0.181818	0.302484
1_02_B1_1	2015-08-14									C	006	C006	2	9	0.222222	0.549907
1_02_B1_1	2015-08-14					cye-1			pos	C	007	C007	13	13	1	5.3128
1_02_B1_1	2015-08-14									C	008	C008	1	12	0.083333	-0.300609
1_02_B1_1	2015-08-14									C	009	C009	1	16	0.0625	-0.428186
1_02_B1_1	2015-08-14									C	010	C010	1	12	0.083333	-0.300609
1_02_B1_1	2015-08-14									C	011	C011	3	14	0.214286	0.501306
1_02_B1_1	2015-08-14									C	012	C012	1	20	0.05	-0.504733
1_02_B1_1	2015-08-14									D	001	D001	0	14	0	-0.810918
1_02_B1_1	2015-08-14									D	002	D002	2	9	0.222222	0.549907
1_02_B1_1	2015-08-14									D	003	D003	1	11	0.090909	-0.254217
1_02_B1_1	2015-08-14									D	004	D004	1	13	0.076923	-0.339863
1_02_B1_1	2015-08-14									D	005	D005	1	11	0.090909	-0.254217
1_02_B1_1	2015-08-14									D	006	D006	4	15	0.266667	0.822072
1_02_B1_1	2015-08-14									D	007	D007	0	13	0	-0.810918
1_02_B1_1	2015-08-14									D	008	D008	2	11	0.181818	0.302484
1_02_B1_1	2015-08-14									D	009	D009	1	9	0.111111	-0.130506
1_02_B1_1	2015-08-14									D	010	D010	3	13	0.230769	0.602246
1_02_B1_1	2015-08-14									D	011	D011	0	15	0	-0.810918
1_02_B1_1	2015-08-14									D	012	D012	1	12	0.083333	-0.300609
1_02_B1_1	2015-08-14									E	001	E001	2	12	0.166667	0.209701
1_02_B1_1	2015-08-14									E	002	E002	1	12	0.083333	-0.300609
1_02_B1_1	2015-08-14									E	003	E003	2	15	0.133333	0.005577
1_02_B1_1	2015-08-14									E	004	E004	2	17	0.117647	-0.090481
1_02_B1_1	2015-08-14									E	005	E005	2	10	0.2	0.413824
1_02_B1_1	2015-08-14									E	006	E006	1	9	0.111111	-0.130506
1_02_B1_1	2015-08-14									E	007	E007	1	10	0.1	-0.198547
1_02_B1_1	2015-08-14									E	008	E008	1	11	0.090909	-0.254217
1_02_B1_1	2015-08-14									E	009	E009	6	15	0.4	1.63857
1_02_B1_1	2015-08-14									E	010	E010	1	11	0.090909	-0.254217
1_02_B1_1	2015-08-14			lag-1					pos	E	011	E011	1	15	0.066667	-0.402671
1_02_B1_1	2015-08-14									E	012	E012	5	14	0.357143	1.37612
1_02_B1_1	2015-08-14									F	001	F001	0	14	0	-0.810918
1_02_B1_1	2015-08-14									F	002	F002	1	21	0.047619	-0.519313
1_02_B1_1	2015-08-14									F	003	F003	1	5	0.2	0.413824
1_02_B1_1	2015-08-14									F	004	F004	0	15	0	-0.810918
1_02_B1_1	2015-08-14									F	005	F005	1	8	0.125	-0.045454
1_02_B1_1	2015-08-14									F	006	F006	4	8	0.5	2.25094
1_02_B1_1	2015-08-14									F	007	F007	0	0	NaN	NaN
1_02_B1_1	2015-08-14									F	008	F008	1	10	0.1	-0.198547
1_02_B1_1	2015-08-14									F	009	F009	1	14	0.071429	-0.37351
1_02_B1_1	2015-08-14									F	010	F010	1	13	0.076923	-0.339863
1_02_B1_1	2015-08-14									F	011	F011	1	19	0.052632	-0.488618
1_02_B1_1	2015-08-14									F	012	F012	0	10	0	-0.810918
1_02_B1_1	2015-08-14									G	001	G001	0	13	0	-0.810918
1_02_B1_1	2015-08-14									G	002	G002	0	16	0	-0.810918
1_02_B1_1	2015-08-14									G	003	G003	2	19	0.105263	-0.166317
1_02_B1_1	2015-08-14	L4440							neg	G	004	G004	0	12	0	-0.810918
1_02_B1_1	2015-08-14									G	005	G005	0	18	0	-0.810918
1_02_B1_1	2015-08-14									G	006	G006	2	18	0.111111	-0.130506
1_02_B1_1	2015-08-14									G	007	G007	2	6	0.333333	1.23032
1_02_B1_1	2015-08-14									G	008	G008	3	13	0.230769	0.602246
1_02_B1_1	2015-08-14									G	009	G009	1	11	0.090909	-0.254217
1_02_B1_1	2015-08-14									G	010	G010	4	22	0.181818	0.302484
1_02_B1_1	2015-08-14									G	011	G011	2	11	0.181818	0.302484
1_02_B1_1	2015-08-14									G	012	G012	0	9	0	-0.810918
1_02_B1_1	2015-08-14									H	001	H001	0	9	0	-0.810918
1_02_B1_1	2015-08-14									H	002	H002	2	12	0.166667	0.209701
1_02_B1_1	2015-08-14									H	003	H003	1	10	0.1	-0.198547
1_02_B1_1	2015-08-14									H	004	H004	0	8	0	-0.810918
1_02_B1_1	2015-08-14				dpy				neg	H	005	H005	0	12	0	-0.810918
1_02_B1_1	2015-08-14									H	006	H006	1	9	0.111111	-0.130506
1_02_B1_1	2015-08-14									H	007	H007	2	14	0.142857	0.063898
1_02_B1_1	2015-08-14		GFP						pos	H	008	H008	15	15	1	5.3128
1_02_B1_1	2015-08-14									H	009	H009	0	9	0	-0.810918
1_02_B1_1	2015-08-14									H	010	H010	1	17	0.058824	-0.4507
1_02_B1_1	2015-08-14									H	011	H011	1	12	0.083333	-0.300609
1_02_B1_1	2015-08-14									H	012	H012	2	10	0.2	0.413824
1_02_B1_2	2015-08-14									A	001	A001	4	11	0.363636	0.891006
1_02_B1_2	2015-08-14									A	002	A002	1	10	0.1	-0.375782
1_02_B1_2	2015-08-14									A	003	A003	2	13	0.153846	-0.117048
1_02_B1_2	2015-08-14									A	004	A004	2	16	0.125	-0.255656
1_02_B1_2	2015-08-14									A	005	A005	4	10	0.4	1.06574
1_02_B1_2	2015-08-14									A	006	A006	2	17	0.117647	-0.290987
1_02_B1_2	2015-08-14									A	007	A007	4	6	0.666667	2.34708
1_02_B1_2	2015-08-14									A	008	A008	1	9	0.111111	-0.322393
1_02_B1_2	2015-08-14									A	009	A009	0	8	0	-0.856288
1_02_B1_2	2015-08-14									A	010	A010	2	12	0.166667	-0.055445
1_02_B1_2	2015-08-14									A	011	A011	1	17	0.058824	-0.573638
1_02_B1_2	2015-08-14									A	012	A012	2	16	0.125	-0.255656
1_02_B1_2	2015-08-14									B	001	B001	2	11	0.181818	0.017359
1_02_B1_2	2015-08-14									B	002	B002	3	10	0.3	0.58523
1_02_B1_2	2015-08-14									B	003	B003	1	14	0.071429	-0.51307
1_02_B1_2	2015-08-14									B	004	B004	2	11	0.181818	0.017359
1_02_B1_2	2015-08-14									B	005	B005	0	5	0	-0.856288
1_02_B1_2	2015-08-14									B	006	B006	2	11	0.181818	0.017359
1_02_B1_2	2015-08-14									B	007	B007	0	5	0	-0.856288
1_02_B1_2	2015-08-14									B	008	B008	0	8	0	-0.856288
1_02_B1_2	2015-08-14									B	009	B009	1	7	0.142857	-0.169851
1_02_B1_2	2015-08-14									B	010	B010	1	8	0.125	-0.255656
1_02_B1_2	2015-08-14									B	011	B011	3	14	0.214286	0.173367
1_02_B1_2	2015-08-14									B	012	B012	2	14	0.142857	-0.169851
1_02_B1_2	2015-08-14									C	001	C001	1	13	0.076923	-0.486668
1_02_B1_2	2015-08-14									C	002	C002	1	13	0.076923	-0.486668
1_02_B1_2	2015-08-14									C	003	C003	1	12	0.083333	-0.455867
1_02_B1_2	2015-08-14									C	004	C004	2	14	0.142857	-0.169851
1_02_B1_2	2015-08-14									C	005	C005	0	5	0	-0.856288
1_02_B1_2	2015-08-14									C	006	C006	2	6	0.333333	0.745398
1_02_B1_2	2015-08-14					cye-1			pos	C	007	C007	12	12	1	3.94877
1_02_B1_2	2015-08-14									C	008	C008	1	7	0.142857	-0.169851
1_02_B1_2	2015-08-14									C	009	C009	1	12	0.083333	-0.455867
1_02_B1_2	2015-08-14									C	010	C010	3	12	0.25	0.344977
1_02_B1_2	2015-08-14									C	011	C011	2	15	0.133333	-0.215614
1_02_B1_2	2015-08-14									C	012	C012	0	14	0	-0.856288
1_02_B1_2	2015-08-14									D	001	D001	1	14	0.071429	-0.51307
1_02_B1_2	2015-08-14									D	002	D002	3	9	0.333333	0.745398
1_02_B1_2	2015-08-14									D	003	D003	2	11	0.181818	0.017359
1_02_B1_2	2015-08-14									D	004	D004	5	14	0.357143	0.859805
1_02_B1_2	2015-08-14									D	005	D005	3	12	0.25	0.344977
1_02_B1_2	2015-08-14									D	006	D006	1	10	0.1	-0.375782
1_02_B1_2	2015-08-14									D	007	D007	3	16	0.1875	0.044661
1_02_B1_2	2015-08-14									D	008	D008	1	13	0.076923	-0.486668
1_02_B1_2	2015-08-14									D	009	D009	3	13	0.230769	0.252572
1_02_B1_2	2015-08-14									D	010	D010	4	12	0.333333	0.745398
1_02_B1_2	2015-08-14									D	011	D011	13	13	1	3.94877
1_02_B1_2	2015-08-14									D	012	D012	1	15	0.066667	-0.535951
1_02_B1_2	2015-08-14									E	001	E001	2	12	0.166667	-0.055445
1_02_B1_2	2015-08-14									E	002	E002	0	12	0	-0.856288
1_02_B1_2	2015-08-14									E	003	E003	2	9	0.222222	0.211503
1_02_B1_2	2015-08-14									E	004	E004	2	16	0.125	-0.255656
1_02_B1_2	2015-08-14									E	005	E005	2	11	0.181818	0.017359
1_02_B1_2	2015-08-14									E	006	E006	2	10	0.2	0.104724
1_02_B1_2	2015-08-14									E	007	E007	1	20	0.05	-0.616035
1_02_B1_2	2015-08-14									E	008	E008	0	12	0	-0.856288
1_02_B1_2	2015-08-14									E	009	E009	0	10	0	-0.856288
1_02_B1_2	2015-08-14									E	010	E010	3	8	0.375	0.945609
1_02_B1_2	2015-08-14			lag-1					pos	E	011	E011	3	18	0.166667	-0.055445
1_02_B1_2	2015-08-14									E	012	E012	4	17	0.235294	0.274314
1_02_B1_2	2015-08-14									F	001	F001	4	13	0.307692	0.622192
1_02_B1_2	2015-08-14									F	002	F002	0	14	0	-0.856288
1_02_B1_2	2015-08-14									F	003	F003	2	16	0.125	-0.255656
1_02_B1_2	2015-08-14									F	004	F004	2	12	0.166667	-0.055445
1_02_B1_2	2015-08-14									F	005	F005	3	8	0.375	0.945609
1_02_B1_2	2015-08-14									F	006	F006	2	9	0.222222	0.211503
1_02_B1_2	2015-08-14									F	007	F007	4	4	1	3.94877
1_02_B1_2	2015-08-14									F	008	F008	0	12	0	-0.856288
1_02_B1_2	2015-08-14									F	009	F009	2	14	0.142857	-0.169851
1_02_B1_2	2015-08-14									F	010	F010	3	9	0.333333	0.745398
1_02_B1_2	2015-08-14									F	011	F011	4	18	0.222222	0.211503
1_02_B1_2	2015-08-14									F	012	F012	3	12	0.25	0.344977
1_02_B1_2	2015-08-14									G	001	G001	1	11	0.090909	-0.419465
1_02_B1_2	2015-08-14									G	002	G002	3	20	0.15	-0.135529
1_02_B1_2	2015-08-14									G	003	G003	0	9	0	-0.856288
1_02_B1_2	2015-08-14	L4440							neg	G	004	G004	1	8	0.125	-0.255656
1_02_B1_2	2015-08-14									G	005	G005	0	9	0	-0.856288
1_02_B1_2	2015-08-14									G	006	G006	1	6	0.166667	-0.055445
1_02_B1_2	2015-08-14									G	007	G007	0	7	0	-0.856288
1_02_B1_2	2015-08-14									G	008	G008	2	15	0.133333	-0.215614
1_02_B1_2	2015-08-14									G	009	G009	0	14	0	-0.856288
1_02_B1_2	2015-08-14									G	010	G010	0	7	0	-0.856288
1_02_B1_2	2015-08-14									G	011	G011	1	11	0.090909	-0.419465
1_02_B1_2	2015-08-14									G	012	G012	2	17	0.117647	-0.290987
1_02_B1_2	2015-08-14									H	001	H001	0	11	0	-0.856288
1_02_B1_2	2015-08-14									H	002	H002	2	17	0.117647	-0.290987
1_02_B1_2	2015-08-14									H	003	H003	2	13	0.153846	-0.117048
1_02_B1_2	2015-08-14									H	004	H004	1	9	0.111111	-0.322393
1_02_B1_2	2015-08-14				dpy				neg	H	005	H005	1	6	0.166667	-0.055445
1_02_B1_2	2015-08-14									H	006	H006	0	7	0	-0.856288
1_02_B1_2	2015-08-14									H	007	H007	1	10	0.1	-0.375782
1_02_B1_2	2015-08-14		GFP						pos	H	008	H008	12	12	1	3.94877
1_02_B1_2	2015-08-14									H	009	H009	1	10	0.1	-0.375782
1_02_B1_2	2015-08-14									H	010	H010	0	13	0	-0.856288
1_02_B1_2	2015-08-14									H	011	H011	1	12	0.083333	-0.455867
1_02_B1_2	2015-08-14									H	012	H012	1	11	0.090909	-0.419465
1_02_B2_1	2015-08-17				dpy				neg	A	001	A001	2	15	0.133333	0.104579
1_02_B2_1	2015-08-17	L4440							neg	A	002	A002	2	23	0.086957	-0.13702
1_02_B2_1	2015-08-17									A	003	A003	0	17	0	-0.590017
1_02_B2_1	2015-08-17									A	004	A004	2	31	0.064516	-0.253922
1_02_B2_1	2015-08-17									A	005	A005	2	23	0.086957	-0.13702
1_02_B2_1	2015-08-17									A	006	A006	1	16	0.0625	-0.264425
1_02_B2_1	2015-08-17									A	007	A007	1	13	0.076923	-0.189289
1_02_B2_1	2015-08-17									A	008	A008	0	0	NaN	NaN
1_02_B2_1	2015-08-17									A	009	A009	0	20	0	-0.590017
1_02_B2_1	2015-08-17									A	010	A010	0	0	NaN	NaN
1_02_B2_1	2015-08-17									A	011	A011	0	9	0	-0.590017
1_02_B2_1	2015-08-17									A	012	A012	0	0	NaN	NaN
1_02_B2_1	2015-08-17		gfp						pos	B	001	B001	11	11	1	4.61945
1_02_B2_1	2015-08-17									B	002	B002	0	0	NaN	NaN
1_02_B2_1	2015-08-17									B	003	B003	1	13	0.076923	-0.189289
1_02_B2_1	2015-08-17									B	004	B004	2	35	0.057143	-0.292333
1_02_B2_1	2015-08-17									B	005	B005	0	27	0	-0.590017
1_02_B2_1	2015-08-17									B	006	B006	2	16	0.125	0.061167
1_02_B2_1	2015-08-17									B	007	B007	2	17	0.117647	0.022862
1_02_B2_1	2015-08-17									B	008	B008	0	0	NaN	NaN
1_02_B2_1	2015-08-17									B	009	B009	0	11	0	-0.590017
1_02_B2_1	2015-08-17									B	010	B010	2	19	0.105263	-0.041652
1_02_B2_1	2015-08-17									B	011	B011	0	18	0	-0.590017
1_02_B2_1	2015-08-17			lag-1					pos	B	012	B012	0	20	0	-0.590017
1_02_B2_1	2015-08-17									C	001	C001	1	17	0.058824	-0.283578
1_02_B2_1	2015-08-17									C	002	C002	1	18	0.055556	-0.300602
1_02_B2_1	2015-08-17									C	003	C003	2	17	0.117647	0.022862
1_02_B2_1	2015-08-17									C	004	C004	1	32	0.03125	-0.427221
1_02_B2_1	2015-08-17									C	005	C005	1	34	0.029412	-0.436798
1_02_B2_1	2015-08-17									C	006	C006	0	18	0	-0.590017
1_02_B2_1	2015-08-17									C	007	C007	1	18	0.055556	-0.300602
1_02_B2_1	2015-08-17									C	008	C008	1	18	0.055556	-0.300602
1_02_B2_1	2015-08-17									C	009	C009	1	12	0.083333	-0.155895
1_02_B2_1	2015-08-17									C	010	C010	1	20	0.05	-0.329544
1_02_B2_1	2015-08-17									C	011	C011	0	0	NaN	NaN
1_02_B2_1	2015-08-17					cye-1			pos	C	012	C012	17	21	0.809524	3.62717
1_02_B2_1	2015-08-17									D	001	D001	1	16	0.0625	-0.264425
1_02_B2_1	2015-08-17									D	002	D002	0	21	0	-0.590017
1_02_B2_1	2015-08-17									D	003	D003	1	23	0.043478	-0.363519
1_02_B2_1	2015-08-17									D	004	D004	0	25	0	-0.590017
1_02_B2_1	2015-08-17									D	005	D005	4	25	0.16	0.243498
1_02_B2_1	2015-08-17									D	006	D006	2	13	0.153846	0.21144
1_02_B2_1	2015-08-17									D	007	D007	0	11	0	-0.590017
1_02_B2_1	2015-08-17									D	008	D008	2	21	0.095238	-0.093877
1_02_B2_1	2015-08-17									D	009	D009	0	15	0	-0.590017
1_02_B2_1	2015-08-17									D	010	D010	2	26	0.076923	-0.189289
1_02_B2_1	2015-08-17									D	011	D011	1	30	0.033333	-0.416368
1_02_B2_1	2015-08-17						mpk-1		pos	D	012	D012	21	22	0.954545	4.38266
1_02_B2_1	2015-08-17									E	001	E001	1	17	0.058824	-0.283578
1_02_B2_1	2015-08-17									E	002	E002	2	19	0.105263	-0.041652
1_02_B2_1	2015-08-17									E	003	E003	0	17	0	-0.590017
1_02_B2_1	2015-08-17									E	004	E004	2	23	0.086957	-0.13702
1_02_B2_1	2015-08-17									E	005	E005	3	12	0.25	0.71235
1_02_B2_1	2015-08-17									E	006	E006	2	18	0.111111	-0.011187
1_02_B2_1	2015-08-17									E	007	E007	5	20	0.25	0.71235
1_02_B2_1	2015-08-17									E	008	E008	1	18	0.055556	-0.300602
1_02_B2_1	2015-08-17									E	009	E009	1	12	0.083333	-0.155895
1_02_B2_1	2015-08-17									E	010	E010	0	13	0	-0.590017
1_02_B2_1	2015-08-17									E	011	E011	3	22	0.136364	0.120365
1_02_B2_1	2015-08-17							mek-2	pos	E	012	E012	19	23	0.826087	3.71346
1_02_B2_1	2015-08-17									F	001	F001	2	18	0.111111	-0.011187
1_02_B2_1	2015-08-17									F	002	F002	1	18	0.055556	-0.300602
1_02_B2_1	2015-08-17									F	003	F003	0	17	0	-0.590017
1_02_B2_1	2015-08-17									F	004	F004	0	27	0	-0.590017
1_02_B2_1	2015-08-17									F	005	F005	1	28	0.035714	-0.403965
1_02_B2_1	2015-08-17									F	006	F006	1	15	0.066667	-0.242719
1_02_B2_1	2015-08-17									F	007	F007	2	18	0.111111	-0.011187
1_02_B2_1	2015-08-17									F	008	F008	4	7	0.571429	2.38682
1_02_B2_1	2015-08-17									F	009	F009	1	13	0.076923	-0.189289
1_02_B2_1	2015-08-17									F	010	F010	1	11	0.090909	-0.116429
1_02_B2_1	2015-08-17									F	011	F011	1	15	0.066667	-0.242719
1_02_B2_1	2015-08-17									F	012	F012	0	0	NaN	NaN
1_02_B2_1	2015-08-17									G	001	G001	1	11	0.090909	-0.116429
1_02_B2_1	2015-08-17									G	002	G002	0	15	0	-0.590017
1_02_B2_1	2015-08-17									G	003	G003	4	23	0.173913	0.315978
1_02_B2_1	2015-08-17									G	004	G004	2	19	0.105263	-0.041652
1_02_B2_1	2015-08-17									G	005	G005	3	22	0.136364	0.120365
1_02_B2_1	2015-08-17									G	006	G006	0	15	0	-0.590017
1_02_B2_1	2015-08-17									G	007	G007	1	11	0.090909	-0.116429
1_02_B2_1	2015-08-17									G	008	G008	1	16	0.0625	-0.264425
1_02_B2_1	2015-08-17									G	009	G009	1	16	0.0625	-0.264425
1_02_B2_1	2015-08-17									G	010	G010	0	15	0	-0.590017
1_02_B2_1	2015-08-17									G	011	G011	2	28	0.071429	-0.217912
1_02_B2_1	2015-08-17									G	012	G012	0	0	NaN	NaN
1_02_B2_1	2015-08-17									H	001	H001	0	16	0	-0.590017
1_02_B2_1	2015-08-17									H	002	H002	3	18	0.166667	0.278228
1_02_B2_1	2015-08-17									H	003	H003	0	0	NaN	NaN
1_02_B2_1	2015-08-17									H	004	H004	3	18	0.166667	0.278228
1_02_B2_1	2015-08-17									H	005	H005	1	17	0.058824	-0.283578
1_02_B2_1	2015-08-17									H	006	H006	5	18	0.277778	0.857058
1_02_B2_1	2015-08-17									H	007	H007	0	8	0	-0.590017
1_02_B2_1	2015-08-17									H	008	H008	0	8	0	-0.590017
1_02_B2_1	2015-08-17									H	009	H009	1	15	0.066667	-0.242719
1_02_B2_1	2015-08-17									H	010	H010	2	20	0.1	-0.06907
1_02_B2_1	2015-08-17									H	011	H011	2	13	0.153846	0.21144
1_02_B2_1	2015-08-17									H	012	H012	0	18	0	-0.590017
1_02_B2_2	2015-08-17				dpy				neg	A	001	A001	0	9	0	-0.506356
1_02_B2_2	2015-08-17	L4440							neg	A	002	A002	2	11	0.181818	0.446983
1_02_B2_2	2015-08-17									A	003	A003	0	23	0	-0.506356
1_02_B2_2	2015-08-17									A	004	A004	0	28	0	-0.506356
1_02_B2_2	2015-08-17									A	005	A005	0	22	0	-0.506356
1_02_B2_2	2015-08-17									A	006	A006	0	16	0	-0.506356
1_02_B2_2	2015-08-17									A	007	A007	2	15	0.133333	0.19276
1_02_B2_2	2015-08-17									A	008	A008	0	0	NaN	NaN
1_02_B2_2	2015-08-17									A	009	A009	2	13	0.153846	0.300316
1_02_B2_2	2015-08-17									A	010	A010	0	0	NaN	NaN
1_02_B2_2	2015-08-17									A	011	A011	2	28	0.071429	-0.13183
1_02_B2_2	2015-08-17									A	012	A012	0	0	NaN	NaN
1_02_B2_2	2015-08-17		gfp						pos	B	001	B001	11	11	1	4.73701
1_02_B2_2	2015-08-17									B	002	B002	0	0	NaN	NaN
1_02_B2_2	2015-08-17									B	003	B003	0	14	0	-0.506356
1_02_B2_2	2015-08-17									B	004	B004	2	24	0.083333	-0.069409
1_02_B2_2	2015-08-17									B	005	B005	0	23	0	-0.506356
1_02_B2_2	2015-08-17									B	006	B006	0	13	0	-0.506356
1_02_B2_2	2015-08-17									B	007	B007	0	17	0	-0.506356
1_02_B2_2	2015-08-17									B	008	B008	0	0	NaN	NaN
1_02_B2_2	2015-08-17									B	009	B009	1	13	0.076923	-0.10302
1_02_B2_2	2015-08-17									B	010	B010	0	24	0	-0.506356
1_02_B2_2	2015-08-17									B	011	B011	0	20	0	-0.506356
1_02_B2_2	2015-08-17			lag-1					pos	B	012	B012	0	16	0	-0.506356
1_02_B2_2	2015-08-17									C	001	C001	0	15	0	-0.506356
1_02_B2_2	2015-08-17									C	002	C002	1	22	0.045455	-0.268021
1_02_B2_2	2015-08-17									C	003	C003	2	16	0.125	0.149065
1_02_B2_2	2015-08-17									C	004	C004	1	21	0.047619	-0.256672
1_02_B2_2	2015-08-17									C	005	C005	1	30	0.033333	-0.331577
1_02_B2_2	2015-08-17									C	006	C006	0	11	0	-0.506356
1_02_B2_2	2015-08-17									C	007	C007	0	20	0	-0.506356
1_02_B2_2	2015-08-17									C	008	C008	1	13	0.076923	-0.10302
1_02_B2_2	2015-08-17									C	009	C009	2	17	0.117647	0.110511
1_02_B2_2	2015-08-17									C	010	C010	1	11	0.090909	-0.029686
1_02_B2_2	2015-08-17									C	011	C011	0	0	NaN	NaN
1_02_B2_2	2015-08-17					cye-1			pos	C	012	C012	11	13	0.846154	3.93034
1_02_B2_2	2015-08-17									D	001	D001	3	16	0.1875	0.476775
1_02_B2_2	2015-08-17									D	002	D002	0	16	0	-0.506356
1_02_B2_2	2015-08-17									D	003	D003	0	15	0	-0.506356
1_02_B2_2	2015-08-17									D	004	D004	3	29	0.103448	0.036061
1_02_B2_2	2015-08-17									D	005	D005	0	27	0	-0.506356
1_02_B2_2	2015-08-17									D	006	D006	1	12	0.083333	-0.069409
1_02_B2_2	2015-08-17									D	007	D007	3	13	0.230769	0.703651
1_02_B2_2	2015-08-17									D	008	D008	2	9	0.222222	0.658836
1_02_B2_2	2015-08-17									D	009	D009	0	15	0	-0.506356
1_02_B2_2	2015-08-17									D	010	D010	2	17	0.117647	0.110511
1_02_B2_2	2015-08-17									D	011	D011	0	11	0	-0.506356
1_02_B2_2	2015-08-17						mpk-1		pos	D	012	D012	11	13	0.846154	3.93034
1_02_B2_2	2015-08-17									E	001	E001	0	13	0	-0.506356
1_02_B2_2	2015-08-17									E	002	E002	3	27	0.111111	0.07624
1_02_B2_2	2015-08-17									E	003	E003	1	13	0.076923	-0.10302
1_02_B2_2	2015-08-17									E	004	E004	1	22	0.045455	-0.268021
1_02_B2_2	2015-08-17									E	005	E005	0	15	0	-0.506356
1_02_B2_2	2015-08-17									E	006	E006	1	15	0.066667	-0.156798
1_02_B2_2	2015-08-17									E	007	E007	0	13	0	-0.506356
1_02_B2_2	2015-08-17									E	008	E008	1	13	0.076923	-0.10302
1_02_B2_2	2015-08-17									E	009	E009	0	16	0	-0.506356
1_02_B2_2	2015-08-17									E	010	E010	0	13	0	-0.506356
1_02_B2_2	2015-08-17									E	011	E011	2	23	0.086957	-0.050411
1_02_B2_2	2015-08-17							mek-2	pos	E	012	E012	13	14	0.928571	4.36248
1_02_B2_2	2015-08-17									F	001	F001	0	17	0	-0.506356
1_02_B2_2	2015-08-17									F	002	F002	0	20	0	-0.506356
1_02_B2_2	2015-08-17									F	003	F003	1	14	0.071429	-0.13183
1_02_B2_2	2015-08-17									F	004	F004	0	18	0	-0.506356
1_02_B2_2	2015-08-17									F	005	F005	0	19	0	-0.506356
1_02_B2_2	2015-08-17									F	006	F006	0	14	0	-0.506356
1_02_B2_2	2015-08-17									F	007	F007	1	14	0.071429	-0.13183
1_02_B2_2	2015-08-17									F	008	F008	0	11	0	-0.506356
1_02_B2_2	2015-08-17									F	009	F009	1	13	0.076923	-0.10302
1_02_B2_2	2015-08-17									F	010	F010	0	19	0	-0.506356
1_02_B2_2	2015-08-17									F	011	F011	2	24	0.083333	-0.069409
1_02_B2_2	2015-08-17									F	012	F012	0	0	NaN	NaN
1_02_B2_2	2015-08-17									G	001	G001	0	18	0	-0.506356
1_02_B2_2	2015-08-17									G	002	G002	2	17	0.117647	0.110511
1_02_B2_2	2015-08-17									G	003	G003	3	17	0.176471	0.418944
1_02_B2_2	2015-08-17									G	004	G004	0	27	0	-0.506356
1_02_B2_2	2015-08-17									G	005	G005	3	19	0.157895	0.321544
1_02_B2_2	2015-08-17									G	006	G006	4	27	0.148148	0.270439
1_02_B2_2	2015-08-17									G	007	G007	1	13	0.076923	-0.10302
1_02_B2_2	2015-08-17									G	008	G008	2	10	0.2	0.542317
1_02_B2_2	2015-08-17									G	009	G009	1	10	0.1	0.017981
1_02_B2_2	2015-08-17									G	010	G010	1	14	0.071429	-0.13183
1_02_B2_2	2015-08-17									G	011	G011	0	17	0	-0.506356
1_02_B2_2	2015-08-17									G	012	G012	0	0	NaN	NaN
1_02_B2_2	2015-08-17									H	001	H001	1	19	0.052632	-0.230389
1_02_B2_2	2015-08-17									H	002	H002	0	24	0	-0.506356
1_02_B2_2	2015-08-17									H	003	H003	0	0	NaN	NaN
1_02_B2_2	2015-08-17									H	004	H004	1	16	0.0625	-0.178645
1_02_B2_2	2015-08-17									H	005	H005	1	24	0.041667	-0.287882
1_02_B2_2	2015-08-17									H	006	H006	6	21	0.285714	0.991748
1_02_B2_2	2015-08-17									H	007	H007	1	11	0.090909	-0.029686
1_02_B2_2	2015-08-17									H	008	H008	0	9	0	-0.506356
1_02_B2_2	2015-08-17									H	009	H009	1	14	0.071429	-0.13183
1_02_B2_2	2015-08-17									H	010	H010	0	12	0	-0.506356
1_02_B2_2	2015-08-17									H	011	H011	2	18	0.111111	0.07624
1_02_B2_2	2015-08-17									H	012	H012	1	15	0.066667	-0.156798
1_03_A1_1	2015-08-14									A	001	A001	1	7	0.142857	-0.12359
1_03_A1_1	2015-08-14									A	002	A002	0	11	0	-0.687594
1_03_A1_1	2015-08-14									A	003	A003	0	11	0	-0.687594
1_03_A1_1	2015-08-14									A	004	A004	0	9	0	-0.687594
1_03_A1_1	2015-08-14									A	005	A005	3	10	0.3	0.496814
1_03_A1_1	2015-08-14									A	006	A006	0	8	0	-0.687594
1_03_A1_1	2015-08-14									A	007	A007	0	4	0	-0.687594
1_03_A1_1	2015-08-14									A	008	A008	0	6	0	-0.687594
1_03_A1_1	2015-08-14									A	009	A009	1	8	0.125	-0.194091
1_03_A1_1	2015-08-14									A	010	A010	0	5	0	-0.687594
1_03_A1_1	2015-08-14									A	011	A011	1	7	0.142857	-0.12359
1_03_A1_1	2015-08-14									A	012	A012	1	10	0.1	-0.292791
1_03_A1_1	2015-08-14									B	001	B001	2	7	0.285714	0.440414
1_03_A1_1	2015-08-14									B	002	B002	1	12	0.083333	-0.358592
1_03_A1_1	2015-08-14									B	003	B003	0	8	0	-0.687594
1_03_A1_1	2015-08-14									B	004	B004	1	12	0.083333	-0.358592
1_03_A1_1	2015-08-14									B	005	B005	2	9	0.222222	0.189745
1_03_A1_1	2015-08-14									B	006	B006	1	6	0.166667	-0.029589
1_03_A1_1	2015-08-14									B	007	B007	3	8	0.375	0.792916
1_03_A1_1	2015-08-14									B	008	B008	1	8	0.125	-0.194091
1_03_A1_1	2015-08-14									B	009	B009	1	11	0.090909	-0.328682
1_03_A1_1	2015-08-14									B	010	B010	1	4	0.25	0.299413
1_03_A1_1	2015-08-14									B	011	B011	0	12	0	-0.687594
1_03_A1_1	2015-08-14									B	012	B012	0	14	0	-0.687594
1_03_A1_1	2015-08-14									C	001	C001	3	12	0.25	0.299413
1_03_A1_1	2015-08-14									C	002	C002	3	10	0.3	0.496814
1_03_A1_1	2015-08-14									C	003	C003	1	12	0.083333	-0.358592
1_03_A1_1	2015-08-14									C	004	C004	0	8	0	-0.687594
1_03_A1_1	2015-08-14									C	005	C005	2	7	0.285714	0.440414
1_03_A1_1	2015-08-14									C	006	C006	1	2	0.5	1.28642
1_03_A1_1	2015-08-14									C	007	C007	0	4	0	-0.687594
1_03_A1_1	2015-08-14									C	008	C008	4	4	1	3.26043
1_03_A1_1	2015-08-14									C	009	C009	1	8	0.125	-0.194091
1_03_A1_1	2015-08-14									C	010	C010	2	7	0.285714	0.440414
1_03_A1_1	2015-08-14									C	011	C011	0	9	0	-0.687594
1_03_A1_1	2015-08-14									C	012	C012	3	13	0.230769	0.223489
1_03_A1_1	2015-08-14									D	001	D001	0	17	0	-0.687594
1_03_A1_1	2015-08-14		GFP						pos	D	002	D002	8	8	1	3.26043
1_03_A1_1	2015-08-14									D	003	D003	2	12	0.166667	-0.029589
1_03_A1_1	2015-08-14						mpk-1		pos	D	004	D004	13	13	1	3.26043
1_03_A1_1	2015-08-14							mek-2	pos	D	005	D005	12	12	1	3.26043
1_03_A1_1	2015-08-14									D	006	D006	0	5	0	-0.687594
1_03_A1_1	2015-08-14									D	007	D007	0	0	NaN	NaN
1_03_A1_1	2015-08-14									D	008	D008	1	7	0.142857	-0.12359
1_03_A1_1	2015-08-14									D	009	D009	0	5	0	-0.687594
1_03_A1_1	2015-08-14									D	010	D010	2	7	0.285714	0.440414
1_03_A1_1	2015-08-14									D	011	D011	1	11	0.090909	-0.328682
1_03_A1_1	2015-08-14									D	012	D012	0	11	0	-0.687594
1_03_A1_1	2015-08-14				dpy				neg	E	001	E001	3	16	0.1875	0.052661
1_03_A1_1	2015-08-14									E	002	E002	0	10	0	-0.687594
1_03_A1_1	2015-08-14									E	003	E003	1	13	0.076923	-0.3839
1_03_A1_1	2015-08-14									E	004	E004	0	0	NaN	NaN
1_03_A1_1	2015-08-14									E	005	E005	12	17	0.705882	2.09925
1_03_A1_1	2015-08-14									E	006	E006	2	12	0.166667	-0.029589
1_03_A1_1	2015-08-14									E	007	E007	6	7	0.857143	2.69643
1_03_A1_1	2015-08-14									E	008	E008	0	7	0	-0.687594
1_03_A1_1	2015-08-14					cye-1			pos	E	009	E009	12	12	1	3.26043
1_03_A1_1	2015-08-14									E	010	E010	3	9	0.333333	0.628415
1_03_A1_1	2015-08-14									E	011	E011	0	15	0	-0.687594
1_03_A1_1	2015-08-14									E	012	E012	2	18	0.111111	-0.248924
1_03_A1_1	2015-08-14									F	001	F001	8	13	0.615385	1.74196
1_03_A1_1	2015-08-14									F	002	F002	0	10	0	-0.687594
1_03_A1_1	2015-08-14									F	003	F003	0	13	0	-0.687594
1_03_A1_1	2015-08-14									F	004	F004	1	12	0.083333	-0.358592
1_03_A1_1	2015-08-14									F	005	F005	0	14	0	-0.687594
1_03_A1_1	2015-08-14									F	006	F006	2	9	0.222222	0.189745
1_03_A1_1	2015-08-14									F	007	F007	0	0	NaN	NaN
1_03_A1_1	2015-08-14									F	008	F008	1	11	0.090909	-0.328682
1_03_A1_1	2015-08-14			lag-1					pos	F	009	F009	1	7	0.142857	-0.12359
1_03_A1_1	2015-08-14									F	010	F010	1	14	0.071429	-0.405592
1_03_A1_1	2015-08-14									F	011	F011	1	13	0.076923	-0.3839
1_03_A1_1	2015-08-14									F	012	F012	1	5	0.2	0.102011
1_03_A1_1	2015-08-14	L4440							neg	G	001	G001	4	10	0.4	0.891617
1_03_A1_1	2015-08-14									G	002	G002	0	12	0	-0.687594
1_03_A1_1	2015-08-14									G	003	G003	1	13	0.076923	-0.3839
1_03_A1_1	2015-08-14									G	004	G004	1	12	0.083333	-0.358592
1_03_A1_1	2015-08-14									G	005	G005	1	13	0.076923	-0.3839
1_03_A1_1	2015-08-14									G	006	G006	0	3	0	-0.687594
1_03_A1_1	2015-08-14									G	007	G007	1	9	0.111111	-0.248924
1_03_A1_1	2015-08-14									G	008	G008	0	8	0	-0.687594
1_03_A1_1	2015-08-14									G	009	G009	0	4	0	-0.687594
1_03_A1_1	2015-08-14									G	010	G010	0	7	0	-0.687594
1_03_A1_1	2015-08-14									G	011	G011	0	10	0	-0.687594
1_03_A1_1	2015-08-14									G	012	G012	1	12	0.083333	-0.358592
1_03_A1_1	2015-08-14									H	001	H001	0	11	0	-0.687594
1_03_A1_1	2015-08-14									H	002	H002	0	12	0	-0.687594
1_03_A1_1	2015-08-14									H	003	H003	2	7	0.285714	0.440414
1_03_A1_1	2015-08-14									H	004	H004	0	10	0	-0.687594
1_03_A1_1	2015-08-14									H	005	H005	1	10	0.1	-0.292791
1_03_A1_1	2015-08-14									H	006	H006	0	10	0	-0.687594
1_03_A1_1	2015-08-14									H	007	H007	1	10	0.1	-0.292791
1_03_A1_1	2015-08-14									H	008	H008	1	12	0.083333	-0.358592
1_03_A1_1	2015-08-14									H	009	H009	3	10	0.3	0.496814
1_03_A1_1	2015-08-14									H	010	H010	0	6	0	-0.687594
1_03_A1_1	2015-08-14									H	011	H011	2	15	0.133333	-0.16119
1_03_A1_1	2015-08-14									H	012	H012	2	11	0.181818	0.030229
1_03_A1_2	2015-08-14									A	001	A001	0	16	0	-0.729383
1_03_A1_2	2015-08-14									A	002	A002	2	13	0.153846	-0.14591
1_03_A1_2	2015-08-14									A	003	A003	3	20	0.15	-0.160497
1_03_A1_2	2015-08-14									A	004	A004	0	13	0	-0.729383
1_03_A1_2	2015-08-14									A	005	A005	2	12	0.166667	-0.097287
1_03_A1_2	2015-08-14									A	006	A006	1	14	0.071429	-0.458485
1_03_A1_2	2015-08-14									A	007	A007	0	9	0	-0.729383
1_03_A1_2	2015-08-14									A	008	A008	1	14	0.071429	-0.458485
1_03_A1_2	2015-08-14									A	009	A009	1	14	0.071429	-0.458485
1_03_A1_2	2015-08-14									A	010	A010	1	21	0.047619	-0.548785
1_03_A1_2	2015-08-14									A	011	A011	2	19	0.105263	-0.330165
1_03_A1_2	2015-08-14									A	012	A012	1	9	0.111111	-0.307986
1_03_A1_2	2015-08-14									B	001	B001	0	11	0	-0.729383
1_03_A1_2	2015-08-14									B	002	B002	2	9	0.222222	0.113411
1_03_A1_2	2015-08-14									B	003	B003	2	14	0.142857	-0.187587
1_03_A1_2	2015-08-14									B	004	B004	2	13	0.153846	-0.14591
1_03_A1_2	2015-08-14									B	005	B005	3	12	0.25	0.21876
1_03_A1_2	2015-08-14									B	006	B006	4	13	0.307692	0.437563
1_03_A1_2	2015-08-14									B	007	B007	0	5	0	-0.729383
1_03_A1_2	2015-08-14									B	008	B008	2	13	0.153846	-0.14591
1_03_A1_2	2015-08-14									B	009	B009	0	8	0	-0.729383
1_03_A1_2	2015-08-14									B	010	B010	0	4	0	-0.729383
1_03_A1_2	2015-08-14									B	011	B011	0	12	0	-0.729383
1_03_A1_2	2015-08-14									B	012	B012	2	18	0.111111	-0.307986
1_03_A1_2	2015-08-14									C	001	C001	3	13	0.230769	0.145826
1_03_A1_2	2015-08-14									C	002	C002	3	9	0.333333	0.534808
1_03_A1_2	2015-08-14									C	003	C003	0	14	0	-0.729383
1_03_A1_2	2015-08-14									C	004	C004	0	14	0	-0.729383
1_03_A1_2	2015-08-14									C	005	C005	2	15	0.133333	-0.223707
1_03_A1_2	2015-08-14									C	006	C006	13	13	1	3.06319
1_03_A1_2	2015-08-14									C	007	C007	0	11	0	-0.729383
1_03_A1_2	2015-08-14									C	008	C008	8	8	1	3.06319
1_03_A1_2	2015-08-14									C	009	C009	2	14	0.142857	-0.187587
1_03_A1_2	2015-08-14									C	010	C010	0	15	0	-0.729383
1_03_A1_2	2015-08-14									C	011	C011	1	10	0.1	-0.350126
1_03_A1_2	2015-08-14									C	012	C012	0	15	0	-0.729383
1_03_A1_2	2015-08-14									D	001	D001	1	12	0.083333	-0.413335
1_03_A1_2	2015-08-14		GFP						pos	D	002	D002	14	14	1	3.06319
1_03_A1_2	2015-08-14									D	003	D003	2	14	0.142857	-0.187587
1_03_A1_2	2015-08-14						mpk-1		pos	D	004	D004	14	14	1	3.06319
1_03_A1_2	2015-08-14							mek-2	pos	D	005	D005	17	17	1	3.06319
1_03_A1_2	2015-08-14									D	006	D006	2	11	0.181818	-0.039824
1_03_A1_2	2015-08-14									D	007	D007	0	0	NaN	NaN
1_03_A1_2	2015-08-14									D	008	D008	1	11	0.090909	-0.384604
1_03_A1_2	2015-08-14									D	009	D009	0	8	0	-0.729383
1_03_A1_2	2015-08-14									D	010	D010	3	7	0.428571	0.896006
1_03_A1_2	2015-08-14									D	011	D011	1	14	0.071429	-0.458485
1_03_A1_2	2015-08-14									D	012	D012	3	13	0.230769	0.145826
1_03_A1_2	2015-08-14				dpy				neg	E	001	E001	1	9	0.111111	-0.307986
1_03_A1_2	2015-08-14									E	002	E002	1	15	0.066667	-0.476545
1_03_A1_2	2015-08-14									E	003	E003	3	15	0.2	0.029132
1_03_A1_2	2015-08-14									E	004	E004	0	0	NaN	NaN
1_03_A1_2	2015-08-14									E	005	E005	6	9	0.666667	1.799
1_03_A1_2	2015-08-14									E	006	E006	1	8	0.125	-0.255311
1_03_A1_2	2015-08-14									E	007	E007	9	9	1	3.06319
1_03_A1_2	2015-08-14									E	008	E008	1	15	0.066667	-0.476545
1_03_A1_2	2015-08-14					cye-1			pos	E	009	E009	6	6	1	3.06319
1_03_A1_2	2015-08-14									E	010	E010	2	9	0.222222	0.113411
1_03_A1_2	2015-08-14									E	011	E011	0	14	0	-0.729383
1_03_A1_2	2015-08-14									E	012	E012	2	12	0.166667	-0.097287
1_03_A1_2	2015-08-14									F	001	F001	5	7	0.714286	1.9796
1_03_A1_2	2015-08-14									F	002	F002	1	15	0.066667	-0.476545
1_03_A1_2	2015-08-14									F	003	F003	1	9	0.111111	-0.307986
1_03_A1_2	2015-08-14									F	004	F004	2	11	0.181818	-0.039824
1_03_A1_2	2015-08-14									F	005	F005	1	13	0.076923	-0.437647
1_03_A1_2	2015-08-14									F	006	F006	2	7	0.285714	0.35421
1_03_A1_2	2015-08-14									F	007	F007	0	0	NaN	NaN
1_03_A1_2	2015-08-14									F	008	F008	1	11	0.090909	-0.384604
1_03_A1_2	2015-08-14			lag-1					pos	F	009	F009	7	17	0.411765	0.832265
1_03_A1_2	2015-08-14									F	010	F010	1	17	0.058824	-0.506291
1_03_A1_2	2015-08-14									F	011	F011	2	13	0.153846	-0.14591
1_03_A1_2	2015-08-14									F	012	F012	0	9	0	-0.729383
1_03_A1_2	2015-08-14	L4440							neg	G	001	G001	0	8	0	-0.729383
1_03_A1_2	2015-08-14									G	002	G002	3	12	0.25	0.21876
1_03_A1_2	2015-08-14									G	003	G003	3	18	0.166667	-0.097287
1_03_A1_2	2015-08-14									G	004	G004	1	12	0.083333	-0.413335
1_03_A1_2	2015-08-14									G	005	G005	1	14	0.071429	-0.458485
1_03_A1_2	2015-08-14									G	006	G006	2	7	0.285714	0.35421
1_03_A1_2	2015-08-14									G	007	G007	1	14	0.071429	-0.458485
1_03_A1_2	2015-08-14									G	008	G008	1	9	0.111111	-0.307986
1_03_A1_2	2015-08-14									G	009	G009	2	11	0.181818	-0.039824
1_03_A1_2	2015-08-14									G	010	G010	1	13	0.076923	-0.437647
1_03_A1_2	2015-08-14									G	011	G011	0	12	0	-0.729383
1_03_A1_2	2015-08-14									G	012	G012	2	9	0.222222	0.113411
1_03_A1_2	2015-08-14									H	001	H001	2	11	0.181818	-0.039824
1_03_A1_2	2015-08-14									H	002	H002	2	14	0.142857	-0.187587
1_03_A1_2	2015-08-14									H	003	H003	1	14	0.071429	-0.458485
1_03_A1_2	2015-08-14									H	004	H004	1	14	0.071429	-0.458485
1_03_A1_2	2015-08-14									H	005	H005	1	12	0.083333	-0.413335
1_03_A1_2	2015-08-14									H	006	H006	1	8	0.125	-0.255311
1_03_A1_2	2015-08-14									H	007	H007	0	5	0	-0.729383
1_03_A1_2	2015-08-14									H	008	H008	0	9	0	-0.729383
1_03_A1_2	2015-08-14									H	009	H009	0	9	0	-0.729383
1_03_A1_2	2015-08-14									H	010	H010	3	12	0.25	0.21876
1_03_A1_2	2015-08-14									H	011	H011	1	8	0.125	-0.255311
1_03_A1_2	2015-08-14									H	012	H012	1	13	0.076923	-0.437647
1_03_A2_1	2015-08-14									A	001	A001	0	2	0	-0.634379
1_03_A2_1	2015-08-14									A	002	A002	1	6	0.166667	0.422099
1_03_A2_1	2015-08-14									A	003	A003	0	10	0	-0.634379
1_03_A2_1	2015-08-14									A	004	A004	0	11	0	-0.634379
1_03_A2_1	2015-08-14									A	005	A005	1	9	0.111111	0.069939
1_03_A2_1	2015-08-14									A	006	A006	1	17	0.058824	-0.261504
1_03_A2_1	2015-08-14									A	007	A007	0	8	0	-0.634379
1_03_A2_1	2015-08-14									A	008	A008	0	15	0	-0.634379
1_03_A2_1	2015-08-14									A	009	A009	1	11	0.090909	-0.058118
1_03_A2_1	2015-08-14									A	010	A010	0	10	0	-0.634379
1_03_A2_1	2015-08-14									A	011	A011	0	5	0	-0.634379
1_03_A2_1	2015-08-14		GFP						pos	A	012	A012	8	9	0.888889	5.00017
1_03_A2_1	2015-08-14									B	001	B001	1	7	0.142857	0.271173
1_03_A2_1	2015-08-14									B	002	B002	0	9	0	-0.634379
1_03_A2_1	2015-08-14									B	003	B003	3	13	0.230769	0.828436
1_03_A2_1	2015-08-14									B	004	B004	0	19	0	-0.634379
1_03_A2_1	2015-08-14									B	005	B005	0	10	0	-0.634379
1_03_A2_1	2015-08-14									B	006	B006	1	7	0.142857	0.271173
1_03_A2_1	2015-08-14									B	007	B007	1	14	0.071429	-0.181603
1_03_A2_1	2015-08-14									B	008	B008	0	8	0	-0.634379
1_03_A2_1	2015-08-14	L4440							neg	B	009	B009	1	14	0.071429	-0.181603
1_03_A2_1	2015-08-14									B	010	B010	1	12	0.083333	-0.10614
1_03_A2_1	2015-08-14									B	011	B011	0	12	0	-0.634379
1_03_A2_1	2015-08-14									B	012	B012	0	12	0	-0.634379
1_03_A2_1	2015-08-14									C	001	C001	0	9	0	-0.634379
1_03_A2_1	2015-08-14									C	002	C002	1	8	0.125	0.157979
1_03_A2_1	2015-08-14									C	003	C003	0	9	0	-0.634379
1_03_A2_1	2015-08-14									C	004	C004	3	15	0.2	0.633394
1_03_A2_1	2015-08-14									C	005	C005	1	15	0.066667	-0.211788
1_03_A2_1	2015-08-14									C	006	C006	1	12	0.083333	-0.10614
1_03_A2_1	2015-08-14									C	007	C007	1	8	0.125	0.157979
1_03_A2_1	2015-08-14									C	008	C008	1	12	0.083333	-0.10614
1_03_A2_1	2015-08-14									C	009	C009	1	13	0.076923	-0.146774
1_03_A2_1	2015-08-14									C	010	C010	1	14	0.071429	-0.181603
1_03_A2_1	2015-08-14									C	011	C011	4	16	0.25	0.950337
1_03_A2_1	2015-08-14									C	012	C012	1	11	0.090909	-0.058118
1_03_A2_1	2015-08-14									D	001	D001	0	11	0	-0.634379
1_03_A2_1	2015-08-14									D	002	D002	2	8	0.25	0.950337
1_03_A2_1	2015-08-14									D	003	D003	6	10	0.6	3.16894
1_03_A2_1	2015-08-14									D	004	D004	1	15	0.066667	-0.211788
1_03_A2_1	2015-08-14									D	005	D005	0	10	0	-0.634379
1_03_A2_1	2015-08-14									D	006	D006	1	13	0.076923	-0.146774
1_03_A2_1	2015-08-14									D	007	D007	0	9	0	-0.634379
1_03_A2_1	2015-08-14									D	008	D008	0	12	0	-0.634379
1_03_A2_1	2015-08-14									D	009	D009	3	14	0.214286	0.723949
1_03_A2_1	2015-08-14									D	010	D010	1	14	0.071429	-0.181603
1_03_A2_1	2015-08-14									D	011	D011	0	8	0	-0.634379
1_03_A2_1	2015-08-14									D	012	D012	0	10	0	-0.634379
1_03_A2_1	2015-08-14									E	001	E001	0	9	0	-0.634379
1_03_A2_1	2015-08-14									E	002	E002	1	9	0.111111	0.069939
1_03_A2_1	2015-08-14									E	003	E003	1	10	0.1	-0.000492
1_03_A2_1	2015-08-14									E	004	E004	3	22	0.136364	0.230012
1_03_A2_1	2015-08-14									E	005	E005	1	11	0.090909	-0.058118
1_03_A2_1	2015-08-14									E	006	E006	1	15	0.066667	-0.211788
1_03_A2_1	2015-08-14									E	007	E007	2	17	0.117647	0.11137
1_03_A2_1	2015-08-14									E	008	E008	0	13	0	-0.634379
1_03_A2_1	2015-08-14									E	009	E009	2	8	0.25	0.950337
1_03_A2_1	2015-08-14									E	010	E010	3	15	0.2	0.633394
1_03_A2_1	2015-08-14									E	011	E011	9	11	0.818182	4.55197
1_03_A2_1	2015-08-14									E	012	E012	1	4	0.25	0.950337
1_03_A2_1	2015-08-14									F	001	F001	1	13	0.076923	-0.146774
1_03_A2_1	2015-08-14									F	002	F002	0	14	0	-0.634379
1_03_A2_1	2015-08-14									F	003	F003	0	11	0	-0.634379
1_03_A2_1	2015-08-14									F	004	F004	1	10	0.1	-0.000492
1_03_A2_1	2015-08-14									F	005	F005	1	9	0.111111	0.069939
1_03_A2_1	2015-08-14									F	006	F006	1	12	0.083333	-0.10614
1_03_A2_1	2015-08-14									F	007	F007	0	9	0	-0.634379
1_03_A2_1	2015-08-14									F	008	F008	2	12	0.166667	0.422099
1_03_A2_1	2015-08-14									F	009	F009	0	10	0	-0.634379
1_03_A2_1	2015-08-14									F	010	F010	1	13	0.076923	-0.146774
1_03_A2_1	2015-08-14									F	011	F011	1	8	0.125	0.157979
1_03_A2_1	2015-08-14									F	012	F012	0	11	0	-0.634379
1_03_A2_1	2015-08-14									G	001	G001	2	7	0.285714	1.17673
1_03_A2_1	2015-08-14									G	002	G002	1	13	0.076923	-0.146774
1_03_A2_1	2015-08-14									G	003	G003	1	8	0.125	0.157979
1_03_A2_1	2015-08-14									G	004	G004	0	6	0	-0.634379
1_03_A2_1	2015-08-14									G	005	G005	3	19	0.157895	0.366495
1_03_A2_1	2015-08-14									G	006	G006	1	18	0.055556	-0.28222
1_03_A2_1	2015-08-14									G	007	G007	0	12	0	-0.634379
1_03_A2_1	2015-08-14									G	008	G008	0	10	0	-0.634379
1_03_A2_1	2015-08-14									G	009	G009	2	15	0.133333	0.210803
1_03_A2_1	2015-08-14									G	010	G010	0	6	0	-0.634379
1_03_A2_1	2015-08-14									G	011	G011	0	8	0	-0.634379
1_03_A2_1	2015-08-14									G	012	G012	0	8	0	-0.634379
1_03_A2_1	2015-08-14									H	001	H001	0	13	0	-0.634379
1_03_A2_1	2015-08-14									H	002	H002	1	14	0.071429	-0.181603
1_03_A2_1	2015-08-14									H	003	H003	1	12	0.083333	-0.10614
1_03_A2_1	2015-08-14									H	004	H004	1	15	0.066667	-0.211788
1_03_A2_1	2015-08-14									H	005	H005	4	24	0.166667	0.422099
1_03_A2_1	2015-08-14									H	006	H006	1	8	0.125	0.157979
1_03_A2_1	2015-08-14									H	007	H007	1	13	0.076923	-0.146774
1_03_A2_1	2015-08-14									H	008	H008	0	7	0	-0.634379
1_03_A2_1	2015-08-14									H	009	H009	0	12	0	-0.634379
1_03_A2_1	2015-08-14									H	010	H010	0	7	0	-0.634379
1_03_A2_1	2015-08-14				dpy				neg	H	011	H011	1	13	0.076923	-0.146774
1_03_A2_1	2015-08-14									H	012	H012	5	7	0.714286	3.89338
1_03_A2_2	2015-08-14									A	001	A001	0	7	0	-0.850697
1_03_A2_2	2015-08-14									A	002	A002	5	15	0.333333	1.23173
1_03_A2_2	2015-08-14									A	003	A003	2	10	0.2	0.398761
1_03_A2_2	2015-08-14									A	004	A004	1	14	0.071429	-0.404462
1_03_A2_2	2015-08-14									A	005	A005	3	15	0.2	0.398761
1_03_A2_2	2015-08-14									A	006	A006	1	14	0.071429	-0.404462
1_03_A2_2	2015-08-14									A	007	A007	0	6	0	-0.850697
1_03_A2_2	2015-08-14									A	008	A008	2	14	0.142857	0.041773
1_03_A2_2	2015-08-14									A	009	A009	0	8	0	-0.850697
1_03_A2_2	2015-08-14									A	010	A010	2	13	0.153846	0.110424
1_03_A2_2	2015-08-14									A	011	A011	0	14	0	-0.850697
1_03_A2_2	2015-08-14		GFP						pos	A	012	A012	12	12	1	5.39659
1_03_A2_2	2015-08-14									B	001	B001	2	14	0.142857	0.041773
1_03_A2_2	2015-08-14									B	002	B002	0	7	0	-0.850697
1_03_A2_2	2015-08-14									B	003	B003	4	14	0.285714	0.934243
1_03_A2_2	2015-08-14									B	004	B004	3	21	0.142857	0.041773
1_03_A2_2	2015-08-14									B	005	B005	1	15	0.066667	-0.434211
1_03_A2_2	2015-08-14									B	006	B006	0	7	0	-0.850697
1_03_A2_2	2015-08-14									B	007	B007	0	10	0	-0.850697
1_03_A2_2	2015-08-14									B	008	B008	1	11	0.090909	-0.282762
1_03_A2_2	2015-08-14	L4440							neg	B	009	B009	2	13	0.153846	0.110424
1_03_A2_2	2015-08-14									B	010	B010	2	8	0.25	0.711126
1_03_A2_2	2015-08-14									B	011	B011	1	16	0.0625	-0.460242
1_03_A2_2	2015-08-14									B	012	B012	3	20	0.15	0.086396
1_03_A2_2	2015-08-14									C	001	C001	0	12	0	-0.850697
1_03_A2_2	2015-08-14									C	002	C002	1	13	0.076923	-0.370136
1_03_A2_2	2015-08-14									C	003	C003	2	21	0.095238	-0.255717
1_03_A2_2	2015-08-14									C	004	C004	1	11	0.090909	-0.282762
1_03_A2_2	2015-08-14									C	005	C005	1	9	0.111111	-0.156554
1_03_A2_2	2015-08-14									C	006	C006	0	9	0	-0.850697
1_03_A2_2	2015-08-14									C	007	C007	0	14	0	-0.850697
1_03_A2_2	2015-08-14									C	008	C008	2	12	0.166667	0.190518
1_03_A2_2	2015-08-14									C	009	C009	1	11	0.090909	-0.282762
1_03_A2_2	2015-08-14									C	010	C010	2	13	0.153846	0.110424
1_03_A2_2	2015-08-14									C	011	C011	1	11	0.090909	-0.282762
1_03_A2_2	2015-08-14									C	012	C012	2	10	0.2	0.398761
1_03_A2_2	2015-08-14									D	001	D001	1	9	0.111111	-0.156554
1_03_A2_2	2015-08-14									D	002	D002	2	10	0.2	0.398761
1_03_A2_2	2015-08-14									D	003	D003	7	11	0.636364	3.12485
1_03_A2_2	2015-08-14									D	004	D004	1	15	0.066667	-0.434211
1_03_A2_2	2015-08-14									D	005	D005	2	12	0.166667	0.190518
1_03_A2_2	2015-08-14									D	006	D006	1	19	0.052632	-0.521892
1_03_A2_2	2015-08-14									D	007	D007	2	14	0.142857	0.041773
1_03_A2_2	2015-08-14									D	008	D008	2	7	0.285714	0.934243
1_03_A2_2	2015-08-14									D	009	D009	2	12	0.166667	0.190518
1_03_A2_2	2015-08-14									D	010	D010	2	14	0.142857	0.041773
1_03_A2_2	2015-08-14									D	011	D011	1	19	0.052632	-0.521892
1_03_A2_2	2015-08-14									D	012	D012	1	14	0.071429	-0.404462
1_03_A2_2	2015-08-14									E	001	E001	2	11	0.181818	0.285174
1_03_A2_2	2015-08-14									E	002	E002	0	10	0	-0.850697
1_03_A2_2	2015-08-14									E	003	E003	1	10	0.1	-0.225968
1_03_A2_2	2015-08-14									E	004	E004	2	11	0.181818	0.285174
1_03_A2_2	2015-08-14									E	005	E005	4	14	0.285714	0.934243
1_03_A2_2	2015-08-14									E	006	E006	1	14	0.071429	-0.404462
1_03_A2_2	2015-08-14									E	007	E007	0	12	0	-0.850697
1_03_A2_2	2015-08-14									E	008	E008	0	10	0	-0.850697
1_03_A2_2	2015-08-14									E	009	E009	5	11	0.454545	1.98898
1_03_A2_2	2015-08-14									E	010	E010	0	10	0	-0.850697
1_03_A2_2	2015-08-14									E	011	E011	5	7	0.714286	3.61165
1_03_A2_2	2015-08-14									E	012	E012	0	13	0	-0.850697
1_03_A2_2	2015-08-14									F	001	F001	0	11	0	-0.850697
1_03_A2_2	2015-08-14									F	002	F002	0	18	0	-0.850697
1_03_A2_2	2015-08-14									F	003	F003	1	14	0.071429	-0.404462
1_03_A2_2	2015-08-14									F	004	F004	0	14	0	-0.850697
1_03_A2_2	2015-08-14									F	005	F005	0	14	0	-0.850697
1_03_A2_2	2015-08-14									F	006	F006	7	16	0.4375	1.88249
1_03_A2_2	2015-08-14									F	007	F007	2	16	0.125	-0.069786
1_03_A2_2	2015-08-14									F	008	F008	2	9	0.222222	0.53759
1_03_A2_2	2015-08-14									F	009	F009	0	14	0	-0.850697
1_03_A2_2	2015-08-14									F	010	F010	2	14	0.142857	0.041773
1_03_A2_2	2015-08-14									F	011	F011	0	11	0	-0.850697
1_03_A2_2	2015-08-14									F	012	F012	4	26	0.153846	0.110424
1_03_A2_2	2015-08-14									G	001	G001	3	22	0.136364	0.001206
1_03_A2_2	2015-08-14									G	002	G002	1	19	0.052632	-0.521892
1_03_A2_2	2015-08-14									G	003	G003	1	14	0.071429	-0.404462
1_03_A2_2	2015-08-14									G	004	G004	2	13	0.153846	0.110424
1_03_A2_2	2015-08-14									G	005	G005	3	15	0.2	0.398761
1_03_A2_2	2015-08-14									G	006	G006	1	15	0.066667	-0.434211
1_03_A2_2	2015-08-14									G	007	G007	3	10	0.3	1.02349
1_03_A2_2	2015-08-14									G	008	G008	1	14	0.071429	-0.404462
1_03_A2_2	2015-08-14									G	009	G009	0	5	0	-0.850697
1_03_A2_2	2015-08-14									G	010	G010	2	9	0.222222	0.53759
1_03_A2_2	2015-08-14									G	011	G011	1	12	0.083333	-0.33009
1_03_A2_2	2015-08-14									G	012	G012	3	16	0.1875	0.32067
1_03_A2_2	2015-08-14									H	001	H001	2	13	0.153846	0.110424
1_03_A2_2	2015-08-14									H	002	H002	0	15	0	-0.850697
1_03_A2_2	2015-08-14									H	003	H003	2	14	0.142857	0.041773
1_03_A2_2	2015-08-14									H	004	H004	3	13	0.230769	0.590985
1_03_A2_2	2015-08-14									H	005	H005	2	12	0.166667	0.190518
1_03_A2_2	2015-08-14									H	006	H006	2	10	0.2	0.398761
1_03_A2_2	2015-08-14									H	007	H007	0	13	0	-0.850697
1_03_A2_2	2015-08-14									H	008	H008	2	12	0.166667	0.190518
1_03_A2_2	2015-08-14									H	009	H009	0	4	0	-0.850697
1_03_A2_2	2015-08-14									H	010	H010	0	11	0	-0.850697
1_03_A2_2	2015-08-14				dpy				neg	H	011	H011	2	15	0.133333	-0.017725
1_03_A2_2	2015-08-14									H	012	H012	4	8	0.5	2.27295
1_03_B1_1	2015-08-14							mek-2	pos	A	001	A001	9	9	1	4.20074
1_03_B1_1	2015-08-14									A	002	A002	4	12	0.333333	0.79286
1_03_B1_1	2015-08-14									A	003	A003	6	13	0.461538	1.44822
1_03_B1_1	2015-08-14									A	004	A004	2	14	0.142857	-0.180821
1_03_B1_1	2015-08-14									A	005	A005	1	9	0.111111	-0.343101
1_03_B1_1	2015-08-14									A	006	A006	1	10	0.1	-0.399899
1_03_B1_1	2015-08-14									A	007	A007	0	12	0	-0.911081
1_03_B1_1	2015-08-14									A	008	A008	2	15	0.133333	-0.229505
1_03_B1_1	2015-08-14									A	009	A009	2	15	0.133333	-0.229505
1_03_B1_1	2015-08-14									A	010	A010	0	6	0	-0.911081
1_03_B1_1	2015-08-14									A	011	A011	0	8	0	-0.911081
1_03_B1_1	2015-08-14									A	012	A012	0	8	0	-0.911081
1_03_B1_1	2015-08-14									B	001	B001	3	10	0.3	0.622465
1_03_B1_1	2015-08-14									B	002	B002	1	7	0.142857	-0.180821
1_03_B1_1	2015-08-14									B	003	B003	0	5	0	-0.911081
1_03_B1_1	2015-08-14									B	004	B004	1	5	0.2	0.111283
1_03_B1_1	2015-08-14									B	005	B005	2	10	0.2	0.111283
1_03_B1_1	2015-08-14									B	006	B006	1	12	0.083333	-0.485096
1_03_B1_1	2015-08-14									B	007	B007	1	9	0.111111	-0.343101
1_03_B1_1	2015-08-14									B	008	B008	0	12	0	-0.911081
1_03_B1_1	2015-08-14									B	009	B009	2	16	0.125	-0.272103
1_03_B1_1	2015-08-14									B	010	B010	3	14	0.214286	0.184309
1_03_B1_1	2015-08-14									B	011	B011	2	10	0.2	0.111283
1_03_B1_1	2015-08-14									B	012	B012	2	16	0.125	-0.272103
1_03_B1_1	2015-08-14									C	001	C001	3	14	0.214286	0.184309
1_03_B1_1	2015-08-14									C	002	C002	1	16	0.0625	-0.591592
1_03_B1_1	2015-08-14	L4440							neg	C	003	C003	0	12	0	-0.911081
1_03_B1_1	2015-08-14									C	004	C004	2	10	0.2	0.111283
1_03_B1_1	2015-08-14									C	005	C005	2	11	0.181818	0.018341
1_03_B1_1	2015-08-14									C	006	C006	2	6	0.333333	0.79286
1_03_B1_1	2015-08-14									C	007	C007	2	10	0.2	0.111283
1_03_B1_1	2015-08-14									C	008	C008	2	21	0.095238	-0.424241
1_03_B1_1	2015-08-14									C	009	C009	2	11	0.181818	0.018341
1_03_B1_1	2015-08-14									C	010	C010	2	15	0.133333	-0.229505
1_03_B1_1	2015-08-14									C	011	C011	2	21	0.095238	-0.424241
1_03_B1_1	2015-08-14									C	012	C012	3	22	0.136364	-0.214014
1_03_B1_1	2015-08-14									D	001	D001	1	14	0.071429	-0.545951
1_03_B1_1	2015-08-14									D	002	D002	3	11	0.272727	0.483052
1_03_B1_1	2015-08-14									D	003	D003	3	11	0.272727	0.483052
1_03_B1_1	2015-08-14									D	004	D004	1	13	0.076923	-0.517864
1_03_B1_1	2015-08-14									D	005	D005	0	13	0	-0.911081
1_03_B1_1	2015-08-14									D	006	D006	0	0	NaN	NaN
1_03_B1_1	2015-08-14									D	007	D007	4	8	0.5	1.64483
1_03_B1_1	2015-08-14									D	008	D008	0	4	0	-0.911081
1_03_B1_1	2015-08-14									D	009	D009	3	18	0.166667	-0.059111
1_03_B1_1	2015-08-14									D	010	D010	2	17	0.117647	-0.30969
1_03_B1_1	2015-08-14									D	011	D011	1	11	0.090909	-0.44637
1_03_B1_1	2015-08-14									D	012	D012	2	11	0.181818	0.018341
1_03_B1_1	2015-08-14									E	001	E001	7	11	0.636364	2.3419
1_03_B1_1	2015-08-14									E	002	E002	3	13	0.230769	0.26857
1_03_B1_1	2015-08-14									E	003	E003	1	8	0.125	-0.272103
1_03_B1_1	2015-08-14									E	004	E004	2	6	0.333333	0.79286
1_03_B1_1	2015-08-14									E	005	E005	2	4	0.5	1.64483
1_03_B1_1	2015-08-14									E	006	E006	2	11	0.181818	0.018341
1_03_B1_1	2015-08-14									E	007	E007	3	12	0.25	0.366874
1_03_B1_1	2015-08-14									E	008	E008	3	13	0.230769	0.26857
1_03_B1_1	2015-08-14									E	009	E009	0	17	0	-0.911081
1_03_B1_1	2015-08-14									E	010	E010	2	12	0.166667	-0.059111
1_03_B1_1	2015-08-14									E	011	E011	4	11	0.363636	0.947763
1_03_B1_1	2015-08-14									E	012	E012	1	21	0.047619	-0.667661
1_03_B1_1	2015-08-14									F	001	F001	1	15	0.066667	-0.570293
1_03_B1_1	2015-08-14				dpy				neg	F	002	F002	3	14	0.214286	0.184309
1_03_B1_1	2015-08-14									F	003	F003	1	11	0.090909	-0.44637
1_03_B1_1	2015-08-14									F	004	F004	0	8	0	-0.911081
1_03_B1_1	2015-08-14									F	005	F005	1	9	0.111111	-0.343101
1_03_B1_1	2015-08-14									F	006	F006	2	11	0.181818	0.018341
1_03_B1_1	2015-08-14									F	007	F007	0	7	0	-0.911081
1_03_B1_1	2015-08-14									F	008	F008	4	15	0.266667	0.452071
1_03_B1_1	2015-08-14									F	009	F009	0	8	0	-0.911081
1_03_B1_1	2015-08-14									F	010	F010	2	14	0.142857	-0.180821
1_03_B1_1	2015-08-14									F	011	F011	4	11	0.363636	0.947763
1_03_B1_1	2015-08-14									F	012	F012	0	22	0	-0.911081
1_03_B1_1	2015-08-14									G	001	G001	3	12	0.25	0.366874
1_03_B1_1	2015-08-14									G	002	G002	2	11	0.181818	0.018341
1_03_B1_1	2015-08-14									G	003	G003	2	12	0.166667	-0.059111
1_03_B1_1	2015-08-14									G	004	G004	0	11	0	-0.911081
1_03_B1_1	2015-08-14									G	005	G005	0	9	0	-0.911081
[truncated: 34,867 more rows]
